# Supplementary material for: Clinical, epidemiological, and spatial features of human rabies cases in Metro Manila, the Philippines from 2006 to 2015
Source: PubMed Central journal article supplement (PMC9295989; doi:10.1371/journal.pntd.0010595), 2022-07-19
Supplement: pntd.0010595.s001.pdf [file pntd.0010595.s001.pdf]

## S1 Table

Characteristics of human rabies patients who were excluded from further analysis because of missing or lost medical charts (n=112)

|           |            | N  | %     |
|-----------|------------|----|-------|
| Year      | 2006       | 45 | 40.2% |
|           | 2007       | 14 | 12.5% |
|           | 2008       | 12 | 10.7% |
|           | 2009       | 16 | 14.3% |
|           | 2010       | 0  | 0.0%  |
|           | 2011       | 4  | 3.6%  |
|           | 2012       | 6  | 5.4%  |
|           | 2013       | 5  | 4.5%  |
|           | 2014       | 4  | 3.6%  |
|           | 2015       | 6  | 5.4%  |
| Age group | <5year     | 5  | 4.5%  |
|           | 5-18 years | 21 | 18.8% |
|           | 19-40years | 26 | 23.2% |
|           | 41-60years | 45 | 40.2% |
|           | >60 years  | 15 | 13.4% |
| Sex       | Male       | 36 | 32.1% |
|           | Female     | 76 | 67.9% |
| Region    | NCR        | 27 | 24.1% |
|           | Region 1   | 6  | 5.4%  |
|           | Region 2   | 2  | 1.8%  |
|           | Region 3   | 35 | 31.3% |
|           | Region 4   | 38 | 33.9% |
|           | Region 5   | 1  | 0.9%  |
|           | Unknown    | 3  | 2.7%  |
