# Supplementary material for: Clinical, epidemiological, and spatial features of human rabies cases in Metro Manila, the Philippines from 2006 to 2015
Source: PLoS Negl Trop Dis. 2022 Jul 19;16(7):e0010595. doi: 10.1371/journal.pntd.0010595 (PMC9295989; doi:10.1371/journal.pntd.0010595)
Supplement: S1 Dataset — (XLS) [file pntd.0010595.s004.xls]

## Sheet: Sheet1
ssid	sex	age	dob	region	province	doa	year	ocu	med_history	medcon	alco	smoker	aniexp	aniexpmonth	aniexpday	typeanimal	pet	nonbite	multibite	bitesite1	bitesite2	bitesite3	face	head	neck	finger	uext	lext	otherbite	anista	prevac	woundtre	medicon	domedicon	slhritmcon	pep	vac1	dovac1	vac2	dovac2	vac3	dovac3	vac4	dovac4	vac5	dovac5	freqpep	vactype	rig
15001	1	12	2002-12-11	4	Rizal	2015-01-01	2015	NR	0				1	9	90	0	0	0	0	4			0	0	0	0	1	0	0	2			0		0	0	0		0		0		0		0		0		0
15002	1	4	2010-03-06	0	NCR	2015-01-11	2015	NR	0				1			0		0		99			0	0	0	0	0	0	0				0		0	0	0		0		0		0		0		0		0
15003	1	43	1971-02-01	0	NCR	2015-01-11	2015	NR	0				1			0	0	0	0	4			0	0	0	0	1	0	0	1			1		1	1	1		1		0		0		0		2
15005	0	46	1968-05-07	4	Rizal	2015-01-15	2015	NR	1	Uterine Ca			1	12	30	0	1	0	0	4			0	0	0	0	1	0	0				0		0	0	0		0		0		0		0		0		0
15006	0	41	1973-07-02	3	Nueva ecija	2015-01-27	2015	NR	0				1	12	30	0	1	0	0	5			0	0	0	0	0	1	0	2			0		0	0	0		0		0		0		0		0		0
15007	1	34	1980-07-07	3	Nueva ecija	2015-01-29	2015	NR	0				1	10	120	0		0	0	3			0	0	0	1	0	0	0	1			0		0	0	0		0		0		0		0		0		0
15009	1	51	1963-08-09	3	Bulacan	2015-02-03	2015	NR	0				1	12	60	0	0	0	0	3			0	0	0	1	0	0	0	1			0		0	0	0		0		0		0		0		0		0
15010	1	27	1987-12-21	0	NCR	2015-02-18	2015	NR	0				1	12	60	0	0	0	0	5			0	0	0	0	0	1	0				0		0	0	0		0		0		0		0		0		0
15011	1	53	1961-07-02	3	Bataan	2015-03-15	2015	NR	0				1	12	90	0		0	1	4	5		0	0	0	0	1	1	0	2			0		0	0	0		0		0		0		0		0		0
15012	1	25	1990-01-31	0	NCR	2015-03-25	2015	NR	0				1	12	90	0		0		99			0	0	0	0	0	0	0				0		0	0	0		0		0		0		0		0		0
15013	0	10	2004-07-04	0	NCR	2015-03-26	2015	NR	0				1	12	90	0		0	0	5			0	0	0	0	0	1	0				0		0	0	0		0		0		0		0		0		0
15014	1	25	1989-05-05	1	Pangasinan	2015-04-14	2015	NR	0		0	0	1	2	60	0		0		99			0	0	0	0	0	0	0	1			1	2015-02-14	3	1	1	2015-02-14	1	2015-02-17	1	2015-02-28	1	2015-03-14	0		4
15015	1	19	1996-03-02	0	NCR	2015-04-15	2015	NR					1	4	14	0	0	0	0	6			0	0	0	0	0	0	1		0		0		0	0	0		0		0		0		0		0		0
15016	0	28	1986-10-14	0	NCR	2015-04-27	2015	NR	0				1	2	60	0		0		99			0	0	0	0	0	0	0				0		0	0	0		0		0		0		0		0		0
15017	1	64	1950-07-08	4	Rizal	2015-04-27	2015	NR	1	PTB			1	4	14	0	1	0	0	0			1	0	0	0	0	0	0				0		0	0	0		0		0		0		0		0		0
15018	0	50	1964-08-04	3	Bulacan	2015-05-04	2015	NR	0				1	3	60	0	1	0	0	4			0	0	0	0	1	0	0				0		0	0	0		0		0		0		0		0		0
15019	1	20	1995-01-02	4	Quezon	2015-05-06	2015	NR	0				1	8	270	0	1	0		99			0	0	0	0	0	0	0				0		0	0	0		0		0		0		0		0		0
15020	0	39	1975-12-23	0	NCR	2015-05-15	2015	NR	0				1	3	60	0		1	0	999													0		0	0	0		0		0		0		0		0		0
15021	1	56	1958-11-22	4	Cavite	2015-06-01	2015	NR	0				1	5	30	0		0	0	0			1	0	0	0	0	0	0				1	2015-05-15		1	1	2015-05-15	1	2015-05-18	1	2015-05-22	0		0		3		0
15022	1	58	1956-10-21	0	NCR	2015-06-11	2015	NR	0				1	11	210	0		0	0	3			0	0	0	1	0	0	0				0		0	0	0		0		0		0		0		0		0
15023	1	44	1970-09-04	3	Pampanga	2015-06-14	2015	NR	0				1	4	60	0		0		99			0	0	0	0	0	0	0				0		0	0	0		0		0		0		0		0		0
15024	1	22	1992-07-07	3	Pampanga	2015-06-17	2015		0				1	3	120	0	1	0	0	4			0	0	0	0	1	0	0				1			1	1		0		0		0		0		1
15025	1	40	1975-01-01	3	Bulacan	2015-06-19	2015	NR	1	PTB			1	5	60	0	1	0	0	4			0	0	0	0	1	0	0	2	0		0		0	0	0		0		0		0		0		0		0
15026	1	20	1994-09-01	3	Bulacan	2015-06-23	2015	NR	0				1		730	0		3	0	999													0		0	0	0		0		0		0		0		0		0
15027	0	62	1952-09-07	3	Zambales	2015-06-30	2015	NR	0				1	12	180	1	0	0	1	1	4		0	1	0	0	1	0	0				0		0	0	0		0		0		0		0		0		0
15028	0	61	1954-03-01	4	Rizal	2015-07-03	2015	NR	0				1	4	60	0	0	0	0	0			1	0	0	0	0	0	0				0		0	0	0		0		0		0		0		0		0
15029	0	37	1978-07-02	0	NCR	2015-07-07	2015	NR	1	Asthma, Fall	0	0	2					5	0	999													0		0	0	0		0		0		0		0		0		0
15030	1	44	1971-02-28	3	Bulacan	2015-07-16	2015	Driver	0				1	5	60	0		0	0	4			0	0	0	0	1	0	0				0		0	0	0		0		0		0		0		0		0
15031	1	42	1973-02-08	0	NCR	2015-07-23	2015	None	1	Illicit drug use	0	0	1		3650	0		0		99			0	0	0	0	0	0	0
15032	1	54	1961-07-09	0	NCR	2015-07-30	2015	NR			0	0	1	8	330	0		0	0	4			0	0	0	0	1	0	0	2			0		0	0	0		0		0		0		0		0		0
15033	1	34	1981-06-07	3	Nueva ecija	2015-08-28	2015	NR	0				1	7	60	0	0	0	0	5			0	0	0	0	0	1	0				0		0	0	0		0		0		0		0		0		0
15034	1	25	1989-11-15	0	NCR	2015-09-04	2015	NR	0				1	6	60	0	0	0	0	4			0	0	0	0	1	0	0				0		0	0	0		0		0		0		0		0		0
15035	1	67	1948-01-06	3	Nueva ecija	2015-09-07	2015	NR	0				1	8	30	0		0	0	4			0	0	0	0	1	0	0	1			0		0	0	0		0		0		0		0		0		0
15036	1	42	1973-02-04	4	Quezon	2015-09-10	2015	NR	0				1		730	0	0	0	0	5			0	0	0	0	0	1	0				0		0	0	0		0		0		0		0		0		0
15037	1	46	1968-12-14	3	Pampanga	2015-09-20	2015	NR	1	PTB			1		730	0		0		99			0	0	0	0	0	0	0	2			0		0	0	0		0		0		0		0		0		0
15038	0	39	1975-11-10	0	NCR	2015-09-22	2015	NR	0				1		365	0		1	0	999													0		0	0	0		0		0		0		0		0		0
15039	0	5	2010-01-03	4	Rizal	2015-09-24	2015	NR	0				1	8	16	0		0	0	2			0	0	1	0	0	0	0				1		1	1	1		1		0		0		0		2		0
15040	1	36	1979-02-02	0	NCR	2015-09-25	2015	NR	0				1	8	30	0	0	0	0	5			0	0	0	0	0	1	0				0		0	0	0		0		0		0		0		0		0
15041	1	20	1995-07-04	0	NCR	2015-09-25	2015	NR	0				1			1		0		99			0	0	0	0	0	0	0				0		0	0	0		0		0		0		0		0		0
15043	1	14	2001-03-05	4	Rizal	2015-10-08	2015	NR	0				1	7	90	0	0	0		99			0	0	0	0	0	0	0				0		0	0	0		0		0		0		0		0		0
15044	1	26	1989-06-03	3	Nueva ecija	2015-10-13	2015	NR	0				1			0	0	0		99			0	0	0	0	0	0	0				0		0	0	0		0		0		0		0		0		0
15045	1	46	1969-02-09	4	Rizal	2015-10-14	2015	NR	0				1	9	14	0	1	3	0	999										0			0		0	0	0		0		0		0		0		0		0
15046	0	51	1964-05-08	0	NCR	2015-10-20	2015	NR	0				1	7	120	0		0	0	3			0	0	0	1	0	0	0	2			0		0	0	0		0		0		0		0		0		0
15047	0	47	1967-10-24	1	Pangasinan	2015-10-23	2015	NR	0				1	3	240	0		0	0	5			0	0	0	0	0	1	0	2			0		0	0	0		0		0		0		0		0		0
15048	0	11	2004-02-05	4	Rizal	2015-10-24	2015	NR					1			0	0	0	0	5			0	0	0	0	0	1	0				0		0	0	0		0		0		0		0		0		0
15049	1	16	1999-08-02	0	NCR	2015-10-30	2015	NR	1	Dental Caries, Seizure			2					5	0	999													0		0	0	0		0		0		0		0		0		0
15051	1	53	1962-07-04	4	Quezon	2015-11-05	2015	NR	1	PTB	1	0	1	9	60	0		0	0	5			0	0	0	0	0	1	0				1	2015-11-04	3	1	1	2015-11-04	0		0		0		0		1		0
15052	0	15	2000-02-16	0	NCR	2015-11-02	2015	NR	0		0	0	1	9	60	1	0	0	0	3			0	0	0	1	0	0	0			1	0		0	0	0		0		0		0		0		0		0
15055	0	20	1995-08-18	4	Rizal	2015-12-02	2015	None	0				1	6	180	0	0	1	0	999													0		0	0	0		0		0		0		0		0		0
15056	1	14	2000-12-14	0	NCR	2015-12-03	2015	NR	0				1	11	30	0		0		99			0	0	0	0	0	0	0				1			1	1		1		1		1		0		3
15057	0	4	2011-11-28	4	Rizal	2015-12-06	2015	NR	0				1	10	30	0		0	0	1			0	1	0	0	0	0	0	1			0		0	0	0		0		0		0		0		0		0
15058	1	4	2011-08-15	0	NCR	2015-12-16	2015	NR	0				1	9	120	0		0	0	4			0	0	0	0	1	0	0	1			0		0	0	0		0		0		0		0		0		0
15059	0	18	1997-05-22	3	Pampanga	2015-12-18	2015	NR					1			0		0	0	5			0	0	0	0	0	1	0				0		0	0	0		0		0		0		0		0		0
15060	1	14	2001-06-02	0	NCR	2015-11-02	2015	NR	0		0	0	1	9	60	0	1	0	0	4			0	0	0	0	1	0	0	2			0		0	0	0		0		0		0		0		0		0
15061	1	63	1952-03-05	3	Bataan	2015-08-21	2015	NR	0				1	7	60	0	0	0	0	5			0	0	0	0	0	1	0	1			0		0	0	0		0		0		0		0		0		0
14001	1	50	1963-03-27	0	NCR	2014-01-02	2014	NR	0				1	12	30	0	1	0	0	0			1	0	0	0	0	0	0	1	0		0		0	0	0		0		0		0		0		0		0
14002	0	2	2011-04-05	4	Cavite	2014-01-19	2014	NR	0		0	0	1	12		0		0	1	0	1	4	1	1	0	0	1	0	0		0			2013-12-22		1	1	2013-12-22	1	2013-12-24	1	2013-12-29	1	2014-01-11	0		4	0	1
14003	0	62	1951-05-24	0	NCR	2014-01-07	2014	NR	0				1	12	30	0		0	0	4			0	0	0	0	1	0	0				0		0	0	0		0		0		0		0		0		0
14004	1	45	1968-09-20	4	Oriental Mindoro	2014-01-24	2014	NR					1	11	60	0		0		99			0	0	0	0	0	0	0	2		0	0		0	0	0		0		0		0		0		0		0
14005	1	58	1956-01-06	4	Rizal	2014-02-10	2014	NR	0				1	1	30	0	1	0	0	4			0	0	0	0	1	0	0		0	0	0		0	0	0		0		0		0		0		0		0
14006	0	56	1957-09-11	3	Nueva ecija	2014-02-27	2014	NR					1	2	14	0		0	0	0			1	0	0	0	0	0	0		0		0		0	0	0		0		0		0		0		0		0
14007	1	43	1970-09-14	4	Rizal	2014-02-11	2014	NR	0				1			0		0		99			0	0	0	0	0	0	0						0
14008	0	64	1949-10-09	4	Oriental Mindoro	2014-02-02	2014	NR	0				1	12	30	0	0	0		99			0	0	0	0	0	0	0	1	0		0		0	0	0		0		0		0		0		0		0
14009	1	21	1992-11-06	3	Nueva ecija	2014-02-09	2014	Tricicle Driver					1	8	180	0		0	0	5			0	0	0	0	0	1	0	1	0	0	0		0	0	0		0		0		0		0		0		0
14010	1	62	1952-01-06	2	Echague	2014-02-17	2014	Farmer					1	12	60	0	1	0		99			0	0	0	0	0	0	0		0	0	0		0	0	0		0		0		0		0		0		0
14011	1	5	2008-05-08	4	Laguna	2014-02-17	2014	NR	0				1	1	21	0	0	0	0	0			1	0	0	0	0	0	0		0		1	2014-01-08	3	1	1	2014-01-28	1	2014-01-31	1	2014-02-04	0		0		3	0	1
14012	1	10	2003-06-14	3	Bulacan	2014-02-21	2014	NR	0				1	12	60	0		0		99			0	0	0	0	0	0	0		0		0		0	0	0		0		0		0		0		0		0
14013	1	17	1996-08-06	0	NCR	2014-02-22	2014	NR	0				1	1	60	0	1	0	0	5			0	0	0	0	0	1	0	1	0	0	0		0	0	0		0		0		0		0		0		0
14014	0	23	1990-05-23	0	NCR	2014-03-09	2014	NR	0		0	0	1	12	90	0	0	0	0	5			0	0	0	0	0	1	0		0	0	0		0	0	0		0		0		0		0		0		0
14015	1	38	1975-07-19	1	Pangasinan	2014-03-09	2014	Construction			1		1	1	60	0		0	0	4			0	0	0	0	1	0	0				1			1	1		0		0		0		0		1		0
14016	1	60	1953-04-20	0	NCR	2014-03-20	2014	Vendor	1	PTB			1	7	240	1	0	0	0	5			0	0	0	0	0	1	0				0		0	0	0		0		0		0		0		0		0
14017	0	43	1970-07-04	0	NCR	2014-03-23	2014	NR	0				1	3	9	0	1	0		99			0	0	0	0	0	0	0				0		0	0	0		0		0		0		0		0		0
14018	1	46	1967-11-29	3	Bulacan	2014-03-26	2014	Construction	0				1		365	0		0		99			0	0	0	0	0	0	0	1		0	0		0	0	0		0		0		0		0		0		0
14019	1	34	1979-12-27	0	NCR	2014-03-29	2014	NR	0				1	11	150	0	0	0	0	5			0	0	0	0	0	1	0	2			0		0	0	0		0		0		0		0		0		0
14020	1	46	1968-02-29	2	Echague	2014-04-08	2014	Farmer	0				1	2	60	0	1	0	0	3			0	0	0	1	0	0	0				1	2014-04-07	3	1	1	2014-04-07	0		0		0		0		1
14021	0	35	1978-05-05	3	Nueva ecija	2014-04-11	2014	NR	0				1	1	90	0		0	0	4			0	0	0	0	1	0	0	2			0		0	0	0		0		0		0		0		0		0
14022	1	58	1955-05-08	4	Cavite	2014-04-12	2014	Houseware costidian	0				1	2	60	0	1	0		99			0	0	0	0	0	0	0	1			0		0	0	0		0		0		0		0		0		0
14023	1	21	1993-02-12	4	Rizal	2014-04-19	2014	NR	0				1			1	0	0		99			0	0	0	0	0	0	0				0		0	0	0		0		0		0		0		0		0
14024	1	29	1984-07-05	4	Batangas	2014-04-20	2014	NR	0		0	0	1	1	90	0	0	0	0	5			0	0	0	0	0	1	0				0		0	0	0		0		0		0		0		0		0
14025	0	63	1951-04-18	0	NCR	2014-04-23	2014	NR	0				1	3	30	0	1	0	0	5			0	0	0	0	0	1	0	1			0		0	0	0		0		0		0		0		0		0
14026	0	45	1969-03-14	4	Laguna	2014-04-26	2014	NR	1	HTN			1	10	180	1		0		99			0	0	0	0	0	0	0				0		0	0	0		0		0		0		0		0		0
14027	1	13	2000-08-11	0	NCR	2014-05-01	2014	NR	0				1	2	90	0	0	0	0	4			0	0	0	0	1	0	0	2			1			1	1		0		0		0		0		1		0
14028	1	10	2004-04-16	0	NCR	2014-05-07	2014	NR	0				1	1	120	0	0	0		99			0	0	0	0	0	0	0	1			0		0	0	0		0		0		0		0		0		0
14029	1	37	1977-01-24	0	NCR	2014-05-10	2014	NR					1	4	30	0	0	0	0	4			0	0	0	0	1	0	0				1	2014-05-07	3	1	1	2014-05-07	0		0		0		0		1		0
14030	1	42	1972-01-03	4	Cavite	2014-05-17	2014	Carpenter	0				1	12	150	0	1	0	0	3			0	0	0	1	0	0	0	1			0		0	0	0		0		0		0		0		0		0
14031	0	53	1961-02-09	3	Nueva ecija	2014-05-22	2014	NR					1	3	60	0	0	0	0	5			0	0	0	0	0	1	0	1			0		0	0	0		0		0		0		0		0		0
14032	1	27	1986-09-20	3	Nueva ecija	2014-05-25	2014	Guard	0				1	11	180	0		0	0	5			0	0	0	0	0	1	0	1			0		0	0	0		0		0		0		0		0		0
14033	0	33	1981-03-04	0	NCR	2014-05-31	2014	NR					1	5	14	0	0	0	0	3			0	0	0	1	0	0	0	0			0		0	0	0		0		0		0		0		0		0
14034	1	57	1956-11-08	3	Nueva ecija	2014-06-02	2014	Farmer	0				1	4	30	0	0	0	0	4			0	0	0	0	1	0	0				0		0	0	0		0		0		0		0		0		0
14035	1	18	1996-05-12	3	Bulacan	2014-06-13	2014	None	0				1	2	120	0	0	0	0	5			0	0	0	0	0	1	0	2			0		0	0	0		0		0		0		0		0		0
14036	1	67	1946-10-27	3	Bulacan	2014-07-13	2014	NR	0				1			0	0	0	0	4			0	0	0	0	1	0	0				0		0	0	0		0		0		0		0		0		0
14037	1	57	1957-01-06	3	Bulacan	2014-07-22	2014	NR	0				1	5	60	0		0	0	3			0	0	0	1	0	0	0	1			0		0	0	0		0		0		0		0		0		0
14038	0	24	1989-11-14	0	NCR	2014-07-14	2014	NR	0				1			0		0	0	5			0	0	0	0	0	1	0				0		0	0	0		0		0		0		0		0		0
14039	1	30		3	Bulacan	2014-07-23	2014	NR	0				1	4	90	0	0	0	0	0			1	0	0	0	0	0	0				0		0	0	0		0		0		0		0		0		0
14040	0	30	1984-01-01	4	Cavite	2014-07-24	2014	NR	0				1	4	90	0		0	0	4			0	0	0	0	1	0	0				0		0	0	0		0		0		0		0		0		0
14041	1	43	1971-02-14	3	Nueva ecija	2014-08-03	2014	NR	0				1	6	60	0		0	0	5			0	0	0	0	0	1	0				0		0	0	0		0		0		0		0		0		0
14042	1	45	1968-10-04	4	Rizal	2014-08-07	2014	NR	0				1	5	90	0	0	0	0	5			0	0	0	0	0	1	0				1			1	1	2013-01-01	0		0		0		0		1		0
14043	1	60	1953-09-15	4	Cavite	2014-08-27	2014	NR	0				1	6	60	0		0	0	3			0	0	0	1	0	0	0				0		0	0	0		0		0		0		0		0		0
14044	0	67	1946-09-26	0	NCR	2014-08-30	2014	NR	0		0	0	1	6	60	1	0	0	1	99			0	0	0	0	0	0	0	0			0		0	0	0		0		0		0		0		0		0
14045	1	32	1982-08-07	3	Pampanga	2014-09-13	2014	NR	0				1	7	60	0		0		99			0	0	0	0	0	0	0	2			0		0	0	0		0		0		0		0		0		0
14046	1	56	1958-09-10	3	Nueva ecija	2014-09-20	2014	NR	0				1	6	90	0	1	0	0	4			0	0	0	0	1	0	0	2			0		0	0	0		0		0		0		0		0		0
14047	0	79	1935-06-25	3	Bulacan	2014-09-20	2014	NR	0				1	6	90	0		0	0	5			0	0	0	0	0	1	0	1			0		0	0	0		0		0		0		0		0		0
14048	1	15	1998-11-10	3	Nueva ecija	2014-10-19	2014	Farmer	0				1		2555	0	1	0	0	5			0	0	0	0	0	1	0				0		0	0	0		0		0		0		0		0		0
14049	1	16	1998-01-19	3	Nueva ecija	2014-11-10	2014	NR	1	URTI, UTI			1		1460	0		0	0	5			0	0	0	0	0	1	0				0		0	0	0		0		0		0		0		0		0
14050	1	49		3	Nueva ecija	2014-11-10	2014	NR	0				1	9	60	0	0	0	0	6			0	0	0	0	0	0	1				0		0	0	0		0		0		0		0		0		0
14051	1	52	1961-12-13	3	Nueva ecija	2014-11-23	2014	NR	0				1	8	90	0	0	0		99			0	0	0	0	0	0	0				0		0	0	0		0		0		0		0		0		0
14052	1	63	1951-12-09	3	Bulacan	2014-12-20	2014	NR	0		1	1	1	11	30	0		0	0	5			0	0	0	0	0	1	0				0		0	0	0		0		0		0		0		0		0
14053	0	3	2011-09-30	1	Pangasinan	2014-12-25	2014	NR	0				1	10	60	0	0	0		99			0	0	0	0	0	0	0				0		0	0	0		0		0		0		0		0		0
14054	1	4	2009-10-18	3	Bulacan	2014-08-14	2014	NR	0				1	7	21	0	0	0	0	0			1	0	0	0	0	0	0				0		0	0	0		0		0		0		0		0		0
14055	0	50	1963-12-30	3	Bulacan	2014-07-20	2014	NR	0				1	5	60	0		0		99			0	0	0	0	0	0	0				0		0	0	0		0		0		0		0		0		0
13001	0	3	2009-10-29	3	Bulacan	2013-01-11	2013	NR	0				1	12	21	0		0	0	0			1	0	0	0	0	0	0	1			0		0	0	0		0		0		0		0		0		0
13002	1	6	2006-11-07	0	NCR	2013-01-11	2013	NR	0				1	12	19	0		0		99			0	0	0	0	0	0	0				0		0	0	0		0		0		0		0		0		0
13003	1	11	2001-12-30	4	Rizal	2013-01-27	2013	NR	0				1	11	90	0	0	1	0	999													1		3	1	1		1		0		0		0		2
13004	1	3	2009-04-25	4	Rizal	2013-02-06	2013	NR	0				1	1	30	0	1	0	0	3			0	0	0	1	0	0	0				0		0	0	0		0		0		0		0		0		0
13005	1	21	1991-03-11	0	NCR	2013-02-15	2013	NR					1	12	60	0		0		99			0	0	0	0	0	0	0				0		0	0	0		0		0		0		0		0		0
13006	1	44	1968-07-19	0	NCR	2013-02-22	2013	Driver	0				1	12	60	0	1	0	0	4			0	0	0	0	1	0	0				0		0	0	0		0		0		0		0		0		0
13007	1	16	1996-07-06	0	NCR	2013-03-12	2013	None	0				1	10	120	0		0	0	5			0	0	0	0	0	1	0				1	2013-03-12	1	1	1	2013-03-12	0		0		0		0		1		0
13008	0	61	1952-01-26	3	Bulacan	2013-03-20	2013	NR	1	HTN			1	12	90	0	1	0	0	5			0	0	0	0	0	1	0				0		0	0	0		0		0		0		0		0		0
13010	1	61	1952-02-27	0	NCR	2013-04-13	2013	NR	0				1	3	30	0	1	0	0	4			0	0	0	0	1	0	0	2			1			1	1		0		0		0		0		1
13011	1	37	1975-10-09	3	Bulacan	2013-04-22	2013	NR	0				1	12	150	0		0	0	5			0	0	0	0	0	1	0	2			0		0	0	0		0		0		0		0		0		0
13012	1	11	2002-03-08	4	Rizal	2013-04-26	2013	NR	0									0	0	5													0		0	0	0		0		0		0		0		0		0
13013	1	9	2003-08-31	0	NCR	2013-05-03	2013	NR	0				1	12	150	0		0	0	3			0	0	0	1	0	0	0				0		0	0	0		0		0		0		0		0		0
13014	1	62	1950-06-29	0	NCR	2013-05-12	2013	NR	0				1	3	60	0		0		99			0	0	0	0	0	0	0				0		0	0	0		0		0		0		0		0		0
13015	0	75	1938-01-03	3	Bulacan	2013-05-14	2013	NR	0				1	4	30	1	0	0		99			0	0	0	0	0	0	0				0		0	0	0		0		0		0		0		0		0
13016	1	11	2001-08-06	4	Quezon	2013-05-15	2013	NR	0				1			0	1	1	0	999													0		0	0	0		0		0		0		0		0		0
13017	1	29	1984-01-02	0	NCR	2013-06-07	2013	NR	0				2					5	0	999													0		0	0	0		0		0		0		0		0		0
13018	1	12	2000-12-17	4	Quezon	2013-06-26	2013	NR	0				1	5	30	0	1	0	1	4	5		0	0	0	0	1	1	0	2			1	2013-05-30	3	1	1	2013-05-30	0		0		0		0		1	1	0
13019	0	29	1983-11-05	4	Cavite	2013-06-29	2013	Housewife	1	Dengue			1	5	60	0	0	0	0	5			0	0	0	0	0	1	0				0		0	0	0		0		0		0		0		0		0
13020	1	24	1989-04-27	4	Quezon	2013-07-09	2013	None	0				1	4	60	0		0		99			0	0	0	0	0	0	0				0		0	0	0		0		0		0		0		0		0
13021	1	32	1981-01-24	4	Laguna	2013-07-14	2013	Farmer	0				1			0	0	0	0	3			0	0	0	1	0	0	0	2			0		0	0	0		0		0		0		0		0		0
13022	0	10	2002-12-03	3	Bulacan	2013-07-15	2013	NR	0				1		365	1	1	0	0	3			0	0	0	1	0	0	0				0		0	0	0		0		0		0		0		0		0
13023	0	47	1965-12-08	0	NCR	2013-08-10	2013	NR	1	Illicit drug use			1		587	0		0		99			0	0	0	0	0	0	0				0		0	0	0		0		0		0		0		0		0
13024	1	13	1999-11-28	3	Bulacan	2013-09-02	2013	NR					1	6	90	0		0		99			0	0	0	0	0	0	0				0		0	0	0		0		0		0		0		0		0
13026	1	48	1964-12-28	4	Cavite	2013-09-13	2013	Construction					1		1460	0		0	0	5			0	0	0	0	0	1	0				0		0	0	0		0		0		0		0		0		0
13027	0	20	1992-12-06	0	NCR	2013-09-17	2013	None	0				1	3	180	0		0		99			0	0	0	0	0	0	0				1			1	1		1		1		1		0
13028	0	67	1946-06-19	3	Bulacan	2013-09-17	2013	Vendor	1	Breast Ca			1	7	60	0		0	0	5			0	0	0	0	0	1	0				0		0	0	0		0		0		0		0		0		0
13030	1	70	1942-10-24	0	NCR	2013-09-28	2013	None	0				1		365	0	0	0	0	4			0	0	0	0	1	0	0				0		0	0	0		0		0		0		0		0		0
13031	1	23	1990-01-31	0	NCR	2013-10-03	2013	Welder					1	8	30	0		0		99			0	0	0	0	0	0	0				0		0	0	0		0		0		0		0		0		0
13032	0	62	1951-10-10	3	Pampanga	2013-11-04	2013	NR	0				1	6	120	0	0	0		99			0	0	0	0	0	0	0	2			0		0	0	0		0		0		0		0		0		0
13033	0	49	1964-05-14	0	NCR	2013-11-11	2013	House keeper					1			0	1	0		99			0	0	0	0	0	0	0	1			0		0	0	0		0		0		0		0		0		0
13034	1	43	1969-12-23	0	NCR	2013-12-07	2013	NR	0				1			0	0	0	0	4			0	0	0	0	1	0	0				0		0	0	0		0		0		0		0		0		0
13035	0	49	1964-09-27	4	Rizal	2013-12-18	2013	Housewife	1	HTN			1	12	14	0	0	0	0	4			0	0	0	0	1	0	0				0		0	0	0		0		0		0		0		0		0
13036	1	17	1996-10-16	0	NCR	2013-12-18	2013	NR	0				1	10	90	0		0	0	5			0	0	0	0	0	1	0				0		0	0	0		0		0		0		0		0		0
12003	1	46	1965-02-18	4	Rizal	2012-01-04	2012	Barker					1	11	90	0		0		99			0	0	0	0	0	0	0				0		0	0	0		0		0		0		0		0		0
12004	1	39	1972-09-11	3	Bulacan	2012-01-05	2012	Laborer	0				1	12		1		0	0	5			0	0	0	0	0	1	0				0		0	0	0		0		0		0		0		0		0
12005	1	48	1963-06-29	0	NCR	2012-01-09	2012	Vendor	0				1	12	60	0	1	3	0	999							1					1	1			1	1		1		1		1		0		4		0
12006	1	27	1984-02-01	3	Bulacan	2012-01-19	2012	Vendor	0				1	8	180	0	0	0	0	5			0	0	0	0	0	1	0				0		0	0	0		0		0		0		0		0		0
12007	1	11	2000-12-11	3	Bulacan	2012-01-22	2012	NR	0				1	12	30	0		0		99			0	0	0	0	0	0	0
12008	1	12	1999-08-05	3	Bulacan	2012-02-01	2012	NR	0				1	10	120	0		0	0	4			0	0	0	0	1	0	0	0		1	0		0	0	0		0		0		0		0		0		0
12009	0	14	1997-05-01	1	Pangasinan	2012-02-17	2012	NR	0				1		1508	1		1	0	999													0		0	0	0		0		0		0		0		0		0
12010	1	9	2002-04-20	4	Rizal	2012-03-10	2012	NR	0				1		365	0	0	0	0	5			0	0	0	0	0	1	0				0		0	0	0		0		0		0		0		0		0
12011	0	53	1958-10-03	4	Oriental Mindoro	2012-03-13	2012	NR	0				1	9	180	0	1	0	0	5			0	0	0	0	0	1	0	2			0		0	0	0		0		0		0		0		0		0
12012	1	60	1951-04-15	0	NCR	2012-03-14	2012	None	0				1		438	0		0		99			0	0	0	0	0	0	0
12013	1	46	1965-07-12	4	Batangas	2012-03-25	2012	Fisherman	1	Diarrhea			1		2640	1	0	0		99			0	0	0	0	0	0	0				0		0	0	0		0		0		0		0		0		0
12014	0	22	1989-07-26	1	Pangasinan	2012-04-18	2012	NR	0				1	12	150	0		0		99			0	0	0	0	0	0	0	2			0		0	0	0		0		0		0		0		0		0
12015	0	44	1967-11-22	4	Cavite	2012-04-20	2012	NR	0				1	2	60	0		0	0	5			0	0	0	0	0	1	0				0		0	0	0		0		0		0		0		0		0
12016	1	28	1984-04-02	3	Bulacan	2012-04-30	2012	Installer	0				1	2	90	0		0	0	3			0	0	0	1	0	0	0	1			0		0	0	0		0		0		0		0		0		0
12017	1	3	2008-07-31	4	Oriental Mindoro	2012-05-10	2012	House keeper	0				1	3	60	0		0	0	0			1	0	0	0	0	0	0				0		0	0	0		0		0		0		0		0		0
12018	0	3	2008-07-15	0	NCR	2012-05-16	2012	NR	0				1	4	30	0		0	0	5			0	0	0	0	0	1	0	1			1			1	1		1		1		1		0
12019	1	8	2003-09-09	4	Rizal	2012-05-19	2012	NR	0				1	5	30	1	1	1	0	999										0			0		0	0	0		0		0		0		0		0		0
12020	1	34	1977-10-09	0	NCR	2012-05-30	2012	Baker	0				1	11	180	0	0	0		99			0	0	0	0	0	0	0				0		0	0	0		0		0		0		0		0		0
12021	1	12	1999-10-18	3	Bulacan	2012-06-05	2012	NR					1	3	90	0	1	0	0	5			0	0	0	0	0	1	0				0		0	0	0		0		0		0		0		0		0
12022	1	41	1971-02-10	3	Bulacan	2012-06-14	2012	None					1	5	20	0	0	0	0	0			1	0	0	0	0	0	0	2			1			1	1		1		0		0		0		2		0
12023	0	53	1959-04-19	0	NCR	2012-06-18	2012	Checker	0		1	1	1	4	60	0		0	0	3			0	0	0	1	0	0	0				0		0	0	0		0		0		0		0		0		0
12024	1	55	1956-10-20	4	Laguna	2012-07-04	2012	None					1	4	90	0		0	0	4			0	0	0	0	1	0	0				0		0	0	0		0		0		0		0		0		0
12025	1	39	1973-02-21	0	NCR	2012-07-15	2012	Carpenter	0				1	6		0	1	0	0	4			0	0	0	0	1	0	0	1			0		0	0	0		0		0		0		0		0		0
12026	0	55	1956-10-17	0	NCR	2012-07-15	2012	NR	0				1	4	60	0	1	0		99			0	0	0	0	0	0	0				0		0	0	0		0		0		0		0		0		0
12027	1	18	1993-07-31	0	NCR	2012-07-18	2012	NR	0				1	5	90	0		0	0	5			0	0	0	0	0	1	0	1			0		0	0	0		0		0		0		0		0		0
12028	0	43	1969-05-05	4	Cavite	2012-07-27	2012	NR	0				1	5	90	0	1	0	0	4			0	0	0	0	1	0	0				0		0	0	0		0		0		0		0		0		0
12029	1	44	1967-12-27	0	NCR	2012-07-31	2012	Vendor	0				1	2	150	0	0	0	0	3			0	0	0	1	0	0	0				0		0	0	0		0		0		0		0		0		0
12030	1	44	1968-06-26	3	Pampanga	2012-08-03	2012	NR	0				1	2	150	0	0	0	0	3			0	0	0	1	0	0	0				0		0	0	0		0		0		0		0		0		0
12031	1	70	1942-01-24	0	NCR	2012-08-05	2012	NR	0				1	6	30	0	0	0	0	5			0	0	0	0	0	1	0				0		0	0	0		0		0		0		0		0		0
12032	1	50	1961-10-22	3	Bulacan	2012-08-10	2012	Farmer	0				1	6	60	0		0		99			0	0	0	0	0	0	0				0		0	0	0		0		0		0		0		0		0
12033	1	45	1967-06-24	4	Cavite	2012-08-10	2012	Butcher	0				1			0	1	0	0	5			0	0	0	0	0	1	0				0		0	0	0		0		0		0		0		0		0
12034	0	43	1968-12-26	4	Oriental Mindoro	2012-08-18	2012	NR	0				1	5	90	0		0	0	5			0	0	0	0	0	1	0	1			1	2012-08-17	3	1	1	2012-08-17	0		0		0		0		1		1
12035	1	2	2010-02-04	4	Rizal	2012-08-18	2012	NR	0				1	6	60	0		0	0	5			0	0	0	0	0	1	0				0		0	0	0		0		0		0		0		0		0
12036	0	48	1963-09-10	0	NCR	2012-08-19	2012	Housemaid					1			0		0		99			0	0	0	0	0	0	0				0		0	0	0		0		0		0		0		0		0
12037	1	19	1993-06-02	0	NCR	2012-08-25	2012	NR	0				1	4	60	0		0	0	5			0	0	0	0	0	1	0				0		0	0	0		0		0		0		0		0		0
12038	1	41	1971-04-07	3	Nueva ecija	2012-08-27	2012	NR	0				1	7	30	0		0	0	3			0	0	0	1	0	0	0				0		0	0	0		0		0		0		0		0		0
12039	0	53	1958-11-08	3	Bulacan	2012-09-11	2012	NR	1	HTN			1	8	30	0	1	0	0	5			0	0	0	0	0	1	0	1			0		0	0	0		0		0		0		0		0		0
12040	1	66	1946-06-27	4	Cavite	2012-09-12	2012	NR	1	PTB			1	7	60	0	1	0	0	4			0	0	0	0	1	0	0	2			0		0	0	0		0		0		0		0		0		0
12041	0	52	1960-06-18	4	Cavite	2012-09-12	2012	NR					1	8	30	0	0	0		99			0	0	0	0	0	0	0				0		0	0	0		0		0		0		0		0		0
12042	0	37	1975-06-26	4	Batangas	2012-09-30	2012	Housewife	0				1	7	60	0	1	0		99			0	0	0	0	0	0	0	2			0		0	0	0		0		0		0		0		0		0
12043	0	44	1968-09-27	3	Bulacan	2012-10-05	2012	NR	0				1	5	120	0		0	0	5			0	0	0	0	0	1	0				0		0	0	0		0		0		0		0		0		0
12044	1	45	1966-11-21	3	Bulacan	2012-10-22	2012	Driver	0				1	7	90	0		0	0	3			0	0	0	1	0	0	0	1			0		0	0	0		0		0		0		0		0		0
12045	1	70	1942-05-15	0	NCR	2012-11-03	2012	NR	1	DM			1	9	60	0		0	0	5			0	0	0	0	0	1	0	0			0		0	0	0		0		0		0		0		0		0
12046	0	29	1983-06-12	0	NCR	2012-11-19	2012	Driver	0				1	6	150	0		0	0	5			0	0	0	0	0	1	0				0		0	0	0		0		0		0		0		0		0
12047	0	58	1954-03-18	3	Bulacan	2012-12-05	2012	NR	1	Stroke			1	9	90	1	1	0	0	5			0	0	0	0	0	1	0	1			0		0	0	0		0		0		0		0		0		0
12048	1	45	1967-05-15	0	NCR	2012-12-09	2012	NR	0				1	11	30	0		0	0	5			0	0	0	0	0	1	0				0		0	0	0		0		0		0		0		0		0
12049	0	6	2006-04-13	0	NCR	2012-12-16	2012	NR	0				1	10	60	0	0	0		99			0	0	0	0	0	0	0				0		0	0	0		0		0		0		0		0		0
12050	1	29	1983-09-19	1	Pangasinan	2012-12-29	2012	NR					1	11	60	0		0	0	5			0	0	0	0	0	1	0				1	2012-11-13	3	1	1	2012-11-13	0		0		0		0		1
11001	1	13	1997-03-28	4	Rizal	2011-01-11	2011	NR	0				1	12	30	0		0	0	0			1	0	0	0	0	0	0				0		0	0	0		0		0		0		0		0		0
11002	0	64	1945-09-02	3	Bulacan	2010-01-22	2010	None	0				1		365	0		0	0	5			0	0	0	0	0	1	0				1			1	1		1		1		1		1		5
11003	1	11	2000-01-25	3	Nueva ecija	2011-01-29	2011	NR	0				1	11	60	0		1	0	999										2			0		0	0	0		0		0		0		0		0		0
11004	1	26	1984-06-28	3	Nueva ecija	2011-01-31	2011	Laborer	0				1	12	60	0		0	0	5			0	0	0	0	0	1	0	2			0		0	0	0		0		0		0		0		0		0
11005	0	23	1987-11-30	3	Nueva ecija	2011-02-01	2011	NR	0				1		3650	0		0	0	3			0	0	0	1	0	0	0				0		0	0	0		0		0		0		0		0		0
11006	0	41	1969-07-04	3	Bulacan	2011-02-11	2011	NR	1	Unknown			1	9	150	0	1	1	0	999										1			0		0	0	0		0		0		0		0		0		0
11007	1	41	1970-01-28	0	NCR	2011-02-19	2011	NR	0				1	1	30	0		0	0	4			0	0	0	0	1	0	0				0		0	0	0		0		0		0		0		0		0
11009	1	56	1954-09-04	4	Rizal	2011-03-08	2011	NR	0				1	1	30	0	1	0	0	4			0	0	0	0	1	0	0	1		1	0		0	0	0		0		0		0		0		0		0
11011	1	14	1996-11-20	3	Bulacan	2011-03-18	2011	NR	0				1		1460	0		0	0	5			0	0	0	0	0	1	0				0		0	0	0		0		0		0		0		0		0
11012	1	37	1973-07-22	0	NCR	2011-03-27	2011	None					1	2	60	0		0	0	5			0	0	0	0	0	1	0	2			1	2011-02-11		1	1	2011-02-11	0		0		0		0		1
11013	0	16	1994-12-27	3	Bulacan	2011-04-08	2011	NR	0				1	3	30	0	1	0	0	4			0	0	0	0	1	0	0	2			0		0	0	0		0		0		0		0		0		0
11014	1	65	1945-11-08	0	NCR	2011-04-10	2011	NR	0				1	3	30	0		0	0	4			0	0	0	0	1	0	0				0		0	0	0		0		0		0		0		0		0
11015	1	21	1990-01-26	0	NCR	2011-04-30	2011	NR					1	4	28	0	0	0	0	3			0	0	0	1	0	0	0	2			1			1	1	2011-04-04	1	2011-04-29	0		0		0		2
11016	1	17	1993-07-07	4	Rizal	2011-05-01	2011	NR	0				1	3	60	0		0	0	5			0	0	0	0	0	1	0				0		0	0	0		0		0		0		0		0		0
11017	1	64	1946-08-23	0	NCR	2011-05-01	2011	NR					1	4		0		0	0	5			0	0	0	0	0	1	0	2
11018	1	48	1963-05-14	4	Rizal	2011-06-14	2011	Painter	0		1		1	1	150	0		3	0	999								1					0		0	0	0		0		0		0		0		0		0
11019	1	51	1959-09-02	1	Pangasinan	2011-06-15	2011	NR	0				1	4	60	0		0	0	4			0	0	0	0	1	0	0	2			0		0	0	0		0		0		0		0		0		0
11020	1	38	1972-10-21	4	Quezon	2011-07-01	2011	NR	0				1	5	60	0		0		99			0	0	0	0	0	0	0				0		0	0	0		0		0		0		0		0		0
11021	1	2	2008-09-26	3	Bulacan	2011-07-03	2011	NR	0				1	5	60	0	0	0	0	5			0	0	0	0	0	1	0	1			0		0	0	0		0		0		0		0		0		0
11022	0	5	2006-06-13	0	NCR	2011-07-05	2011	NR	0				1	4	90	0	0	0		99			0	0	0	0	0	0	0				0		0	0	0		0		0		0		0		0		0
11023	1	9	2001-11-25	4	Manicipality of San Andres	2011-07-16	2011	Farmer	0				1	7	14	0	1	0	0	0			1	0	0	0	0	0	0				0		0	0	0		0		0		0		0		0		0
11024	0	7	2003-09-18	4	Quezon	2011-07-18	2011	NR	0				1	5	90	0		0	0	5			0	0	0	0	0	1	0				0		0	0	0		0		0		0		0		0		0
11025	1	35	1975-10-09	3	Bulacan	2011-07-21	2011	NR	1	Asthma			1	6	60	0	1	0	0	4			0	0	0	0	1	0	0	1			0		0	0	0		0		0		0		0		0		0
11026	0	20	1990-09-10	3	Bulacan	2011-07-30	2011	None	0				1	5	90	0	0	0	0	5			0	0	0	0	0	1	0				0		0	0	0		0		0		0		0		0		0
11027	1	13	1997-11-02	4	Cavite	2011-07-31	2011	NR	0				1	4	90	0	0	0	0	5			0	0	0	0	0	1	0				0		0	0	0		0		0		0		0		0		0
11028	1	4	2006-11-15	0	NCR	2011-08-24	2011	NR	0				1	5	90	0	0	0	0	5			0	0	0	0	0	1	0				0		0	0	0		0		0		0		0		0		0
11029	1	45	1966-04-14	0	NCR	2011-08-28	2011	NR	0				1	7	30	0	1	0	0	3			0	0	0	1	0	0	0				0		0	0	0		0		0		0		0		0		0
11030	1	10	2001-04-22	4	Cavite	2011-08-28	2011	NR	0				1	6	60	0	1	0	0	4			0	0	0	0	1	0	0	2			0		0	0	0		0		0		0		0		0		0
11031	1	13	1998-01-09	4	Rizal	2011-10-11	2011	NR	0				1	8	60	0	0	0		99			0	0	0	0	0	0	0	1			0		0	0	0		0		0		0		0		0		0
11032	1	29	1982-01-02	4	Rizal	2011-10-15	2011	NR	0				1	2	240	0		0	0	4			0	0	0	0	1	0	0	1			0		0	0	0		0		0		0		0		0		0
11033	1	64	1947-07-14	0	NCR	2011-11-08	2011	NR	1	HTN			1	10	30	0		0	0	5			0	0	0	0	0	1	0				0		0	0	0		0		0		0		0		0		0
11034	0	48	1963-02-24	0	NCR	2011-11-28	2011	NR	0				1	9	60	1		1	0	999										1			0		0	0	0		0		0		0		0		0		0
10001	0	5	2004-03-09	0	NCR	2010-01-07	2010	NR	0				1	10	90	0		0	0	6			0	0	0	0	0	0	1				1	2009-10-01	3	1	1	2009-10-01	0		0		0		0		1
10002	1	46	1963-02-15	0	NCR	2010-01-12	2010	NR	0				1	9	120	0		0	0	6			0	0	0	0	0	0	1
10003	1	36	1973-07-12	4	Cavite	2010-01-20	2010	NR	0				2					5	0	999											0	0	0		0	0	0		0		0		0		0		0		0
10004	1	34	1975-10-05	4	Laguna	2010-01-20	2010	NR	0				1	10	120	0		0	0	5			0	0	0	0	0	1	0	1			0		0	0	0		0		0		0		0		0		0
10005	0	9	2000-06-22	4	Quezon	2010-01-21	2010	NR	0				1	12	30	0	0	0	0	5			0	0	0	0	0	1	0	2			0		0	0	0		0		0		0		0		0		0
10006	1	8	2001-12-18	4	Rizal	2010-01-27	2010	NR	0				1	12	7	0		0	0	5			0	0	0	0	0	1	0
10007	1	23	1986-02-19	3	Bulacan	2010-01-30	2010	NR	0				1		1460	0	1	0	1	3	4		0	0	0	1	1	0	0	2			0		0	0	0		0		0		0		0		0		0
10008	1	81	1928-05-14	3	Bulacan	2010-02-04	2010	NR	1	HTN, PTB			1	9	120	0	0	0		99			0	0	0	0	0	0	0				0		0	0	0		0		0		0		0		0		0
10009	1	3	2006-09-16	3	Nueva ecija	2010-02-08	2010		1	Asthma			1	12	60	0	1	0	0	4			0	0	0	0	1	0	0	2			0		0	0	0		0		0		0		0		0		0
10010	0	21	1988-07-03	0	NCR	2010-02-12	2010	NR	0				1	12	60	0		0	0	5			0	0	0	0	0	1	0	0			0		0	0	0		0		0		0		0		0		0
10011	0	27	1983-01-27	3	Bulacan	2010-02-13	2010	NR	0				1	11	90	0		0		99			0	0	0	0	0	0	0	2			0		0	0	0		0		0		0		0		0		0
10012	1	38	1971-08-20	3	Pampanga	2010-02-17	2010	Construction	0				1			0	1	4	0	999													0		0	0	0		0		0		0		0		0		0
10013	1	18	1991-05-02	3	Bulacan	2010-02-23	2010	NR	0				1		3650	0		0		99			0	0	0	0	0	0	0				0		0	0	0		0		0		0		0		0		0
10014	1	56	1953-09-03	2	Isabera	2010-02-24	2010	NR	0				1	12	60	0		0	0	5			0	0	0	0	0	1	0	2
10015	0	54	1955-07-16	3	Nueva ecija	2010-02-28	2010	NR	0				1	8	210	0		0		99			0	0	0	0	0	0	0	2			0		0	0	0		0		0		0		0		0		0
10016	1	5	2004-10-22	0	NCR	2010-03-02	2010	NR	0				1	1	30	0		0	0	3			0	0	0	1	0	0	0
10017	0	7	2002-10-23	3	Bulacan	2010-03-02	2010	NR	0				1	2	21	0	0	0	0	5			0	0	0	0	0	1	0				0		0	0	0		0		0		0		0		0		0
10018	1	47	1962-11-29	0	NCR	2010-03-11	2010	NR	0				1	11	120	0	1	0	0	4			0	0	0	0	1	0	0	1			0		0	0	0		0		0		0		0		0		0
10019	1	41	1969-01-31	4	Oriental Mindoro	2010-03-20	2010	NR	0				1	1	60	0		0	0	4			0	0	0	0	1	0	0	2			0		0	0	0		0		0		0		0		0		0
10020	1	40	1969-07-30	4	Quezon	2010-03-22	2010	NR	0				1	2	60	0		0	0	4			0	0	0	0	1	0	0	2			0		0	0	0		0		0		0		0		0		0
10021	1	20	1989-11-12	0	NCR	2010-03-24	2010	NR					1	1	60	0		0	0	5			0	0	0	0	0	1	0	2			0		0	0	0		0		0		0		0		0		0
10022	1	38	1971-07-09	4	Rizal	2010-04-01	2010	NR	1	Asthma	1	1	1		1095	0		2	0	999			1										0		0	0	0		0		0		0		0		0		0
10023	1	35	1974-09-05	0	NCR	2010-04-19	2010	NR	0		0	0	1	3	30	0	0	0	0	4			0	0	0	0	1	0	0	2			0		0	0	0		0		0		0		0		0		0
10024	1	47	1962-07-26	0	NCR	2010-04-23	2010	NR	0				1		1095	0	1	1	0	999										1			0		0	0	0		0		0		0		0		0		0
10025	0	55	1954-11-24	3	Bulacan	2010-04-29	2010	NR	0				1			0		0		99			0	0	0	0	0	0	0				0		0	0	0		0		0		0		0		0		0
10026	1	41	1969-04-15	4	Rizal	2010-05-01	2010	NR	0				1	4	30	0		0		99			0	0	0	0	0	0	0				0		0	0	0		0		0		0		0		0		0
10027	1	26	1983-06-07	3	Bulacan	2010-05-01	2010	NR	0				1	4	30	0		0		99			0	0	0	0	0	0	0	0			0		0	0	0		0		0		0		0		0		0
10028	1	34	1975-11-01	3	Nueva ecija	2010-05-25	2010	NR	0				1	5	21			3	0	999												0	0		0	0	0		0		0		0		0		0		0
10029	0	38	1972-03-18	3	Bulacan	2010-05-28	2010	Housewife	0				1	4	60	0		0	0	5			0	0	0	0	0	1	0	2			0		0	0	0		0		0		0		0		0		0
10030	1	41	1968-09-15	0	NCR	2010-05-29	2010	NR	0				1	3	60	0	1	0	0	4			0	0	0	0	1	0	0	2			0		0	0	0		0		0		0		0		0		0
10031	0	64	1945-07-29	3	Nueva ecija	2010-05-30	2010	NR	1	HTN			1	2	120	0		0	0	4			0	0	0	0	1	0	0	1			0		0	0	0		0		0		0		0		0		0
10032	1	44	1966-05-23	3	Nueva ecija	2010-05-31	2010	NR	0			1	1	2	120	0	0	0	0	5			0	0	0	0	0	1	0				0		0	0	0		0		0		0		0		0		0
10033	1	58	1951-06-22	3	Bulacan	2010-06-04	2010	NR	0			1	1	4	60	0	0	0	0	4			0	0	0	0	1	0	0	2			0		0	0	0		0		0		0		0		0		0
10034	0	41	1969-03-14	0	NCR	2010-06-08	2010	House keeper	0				1	5	30	0		0	1	5	6		0	0	0	0	0	1	1				0		0	0	0		0		0		0		0		0		0
10035	1	35	1974-11-30	3	Nueva ecija	2010-06-10	2010	Farmer	0				1	4	30	0	1	0	0	4			0	0	0	0	1	0	0	1			0		0	0	0		0		0		0		0		0		0
10036	0	45	1964-09-14	1	Pangasinan	2010-06-14	2010	NR	0				1	4	60	0	0	0	0	5			0	0	0	0	0	1	0				0		0	0	0		0		0		0		0		0		0
10037	1	20	1989-08-28	4	Rizal	2010-07-11	2010	Helper	0				1	5	90	0	1	0	0	4			0	0	0	0	1	0	0	2			0		0	0	0		0		0		0		0		0		0
10038	1	39	1970-07-20	4	Rizal	2010-07-19	2010	NR	0		1	1	1	6	21	0		0	0	5			0	0	0	0	0	1	0				0		0	0	0		0		0		0		0		0		0
10039	0	48	1962-02-22	3	Bulacan	2010-07-22	2010	NR	0		0	0	1	5	90	1		0	0	3			0	0	0	1	0	0	0	0			0		0	0	0		0		0		0		0		0		0
10040	0	21	1988-10-25	3	Bataan	2010-08-05	2010	NR	0				1	5	90	0	0	0	0	4			0	0	0	0	1	0	0	2			0		0	0	0		0		0		0		0		0		0
10041	1	64	1946-02-13	3	Bulacan	2010-08-14	2010	NR	0				1	7		0	1	0	1	4	5		0	0	0	0	1	1	0	2			0		0	0	0		0		0		0		0		0		0
10042	0	64	1946-06-10	0	NCR	2010-08-15	2010	NR	0				1	5	90	0	0	0	0	5			0	0	0	0	0	1	0				0		0	0	0		0		0		0		0		0		0
10043	1	23	1986-11-20	4	Quezon	2010-09-01	2010	NR	0				1	7	60	0	1	0	0	5			0	0	0	0	0	1	0	2			0		0	0	0		0		0		0		0		0		0
10044	1	15	1995-06-15	3	Bulacan	2010-09-02	2010	None	0				1	5	120	0		0		99			0	0	0	0	0	0	0	1			0		0	0	0		0		0		0		0		0		0
10045	0	68	1942-05-14	3	Bulacan	2010-09-11	2010	NR	0				1	7	60	0	0	2	0	999										1			0		0	0	0		0		0		0		0		0		0
10046	0	7	2003-08-12	4	Cavite	2010-09-19	2010	NR	0				1	8	60	0		0	0	5			0	0	0	0	0	1	0	2			0		0	0	0		0		0		0		0		0		0
10047	1	48	1962-05-22	0	NCR	2010-09-25	2010	NR	0				1	7	90	0		0	0	5			0	0	0	0	0	1	0				0		0	0	0		0		0		0		0		0		0
10048	1	53	1957-07-21	1	Pangasinan	2010-09-27	2010	NR	0				1	7	90	0	0	0		99			0	0	0	0	0	0	0				0		0	0	0		0		0		0		0		0		0
10049	1	5	2004-12-01	0	NCR	2010-10-04	2010	NR	0				1	9	30	0		0	0	4			0	0	0	0	1	0	0	2			0		0	0	0		0		0		0		0		0		0
10050	1	61	1948-12-04	3	Bulacan	2010-10-09	2010	NR	1	Cardiac disease, DM, HTN			1		365	0		0		99			0	0	0	0	0	0	0				0		0	0	0		0		0		0		0		0		0
10051	0	3	2007-04-07	0	NCR	2010-10-17	2010	NR	0				1	8	60	0		0	0	4			0	0	0	0	1	0	0				0		0	0	0		0		0		0		0		0		0
10052	0	19	1991-06-24	3	Nueva ecija	2010-10-17	2010	NR	0				1	5	180	0	0	0	0	5			0	0	0	0	0	1	0				0		0	0	0		0		0		0		0		0		0
10053	1	21	1989-02-05	3	Nueva ecija	2010-10-18	2010	NR	0				2					5	0	999													0		0	0	0		0		0		0		0		0		0
10054	1	46	1964-06-07	0	NCR	2010-10-18	2010	NR	0				1		3650	0		3	0	999
10055	1	13	1997-07-28	4	Rizal	2010-10-27	2010	NR	0				1	3	365	0		0	0	4			0	0	0	0	1	0	0	0			0		0	0	0		0		0		0		0		0		0
10056	1	49	1961-04-01	3	Nueva ecija	2010-10-30	2010	NR	0				1	10	14	0	1	0	0	0			1	0	0	0	0	0	0	2			0		0	0	0		0		0		0		0		0		0
10057	1	8	2001-12-31	3	Bulacan	2010-11-02	2010	NR	0				1	9	30	0		0	0	5			0	0	0	0	0	1	0				1			1	1		1		0		0		0		2
10058	0	30	1980-07-24	4	Quezon	2010-11-06	2010	NR	0		0	0	1	8	90	0		0	0	4			0	0	0	0	1	0	0				0		0	0	0		0		0		0		0		0		0
10059	1	41	1969-11-08	3	Zambales	2010-11-10	2010	NR	0				1	3	240	0		0	0	5			0	0	0	0	0	1	0				0		0	0	0		0		0		0		0		0		0
10060	0	37	1973-01-21	4	Batangas	2010-11-24	2010	NR	0				1	4	240	0		0	0	4			0	0	0	0	1	0	0	1			0		0	0	0		0		0		0		0		0		0
10061	1	14	1996-04-19	4	Cavite	2010-11-29	2010	NR	0				1		730	0	0	0	0	4			0	0	0	0	1	0	0				0		0	0	0		0		0		0		0		0		0
10062	1	35	1975-10-01	4	Oriental Mindoro	2010-12-12	2010	NR	0				1	10	60	0		0	0	5			0	0	0	0	0	1	0				0		0	0	0		0		0		0		0		0		0
10063	1	23	1986-12-29	1	Ilocos sur	2010-12-28	2010	NR	0				1		1825	0		0		99			0	0	0	0	0	0	0	2			0		0	0	0		0		0		0		0		0		0
10064	1	28	1982-06-19	3	Bulacan	2010-12-28	2010	NR	0				1		1095	0		0	0	5			0	0	0	0	0	1	0	1			0		0	0	0		0		0		0		0		0		0
10065	1	33	1977-07-27	3	Pampanga	2010-12-29	2010	NR	0				1	10	60	0		0	0	4			0	0	0	0	1	0	0				0		0	0	0		0		0		0		0		0		0
9002	1	30	1978-02-16	0	NCR	2009-01-08	2009	NR	0				1		365	0		0		99			0	0	0	0	0	0	0				1			1	1		1		0		0		0		2
9003	1	10	1998-10-19	4	Cavite	2009-01-09	2009	NR					1	9	90	0	0	0	1	4	5		0	0	0	0	1	1	0				0		0	0	0		0		0		0		0		0		0
9004	1	42	1966-12-23	4	Laguna	2009-01-16	2009	NR	0				1	11	60	0	0	0		99			0	0	0	0	0	0	0				0		0	0	0		0		0		0		0		0		0
9005	1	46	1962-08-30	1	Pangasinan	2009-01-25	2009	NR	0				1	1	21	1		0	0	4			0	0	0	0	1	0	0				0		0	0	0		0		0		0		0		0		0
9006	1	34	1974-03-10	3	Bulacan	2009-02-01	2009	NR	0				1	1	30	0		0	0	4			0	0	0	0	1	0	0				0		0	0	0		0		0		0		0		0		0
9008	1	24	1984-10-13	0	NCR	2009-02-14	2009	NR	0				1	4	300	0	0	0	0	4			0	0	0	0	1	0	0				0		0	0	0		0		0		0		0		0		0
9009	0	33	1975-05-24	0	NCR	2009-02-20	2009	NR	0				1	12	60	1	0	0	0	5			0	0	0	0	0	1	0	2			0		0	0	0		0		0		0		0		0		0
9010	0	27	1981-03-13	4	Rizal	2009-02-28	2009	NR					1	10	120	0	1	2	0	999								1
9011	0	7	2002-01-13	0	NCR	2009-03-06	2009	NR					1	1	90	0		0	0	5			0	0	0	0	0	1	0	1			0		0	0	0		0		0		0		0		0		0
9012	1	18	1990-10-11	4	Rizal	2009-03-14	2009	NR					1	2	30	0	1	0		99			0	0	0	0	0	0	0	1			0		0	0	0		0		0		0		0		0		0
9013	1	54	1955-01-06	3	Bulacan	2009-03-17	2009	NR	0				1	11	150	0	0	0	0	3			0	0	0	1	0	0	0
9014	1	60	1948-12-08	3	Bulacan	2009-03-21	2009	NR	0				1			0		0	0	5			0	0	0	0	0	1	0	2			0		0	0	0		0		0		0		0		0		0
9015	1	40	1968-10-14	3	Nueva ecija	2009-04-07	2009	NR	0				1	11	150	0		0		99			0	0	0	0	0	0	0	2			0		0	0	0		0		0		0		0		0		0
9016	1	46	1962-10-11	0	NCR	2009-04-19	2009	NR					1			0		0	1	4	6		0	0	0	0	1	0	1				0		0	0	0		0		0		0		0		0		0
9017	1	36	1972-04-29	0	NCR	2009-04-20	2009	NR					1	1	90	0	1	0	0	5			0	0	0	0	0	1	0	2			0		0	0	0		0		0		0		0		0		0
9018	1	75	1934-01-11	4	Laguna	2009-05-07	2009	NR	0				1			0		0		99			0	0	0	0	0	0	0
9021	0	51	1958-04-03	0	NCR	2009-05-12	2009	NR					1		3650	0		0		99			0	0	0	0	0	0	0
9026	0	70	1939-01-05	3	Nueva ecija	2009-06-03	2009	NR					1		730	0		0	0	4			0	0	0	0	1	0	0	1			0		0	0	0		0		0		0		0		0		0
9027	1	7	2001-06-17	4	Batangas	2009-06-04	2009	NR					1			0		0	0	3			0	0	0	1	0	0	0	1			0		0	0	0		0		0		0		0		0		0
9028	1	20	1988-10-21	0	NCR	2009-06-07	2009	NR	0				1	5	30	0		0		99			0	0	0	0	0	0	0				0		0	0	0		0		0		0		0		0		0
9029	1	44	1964-10-11	3	Bulacan	2009-06-11	2009	NR	0				1	4	30	0		0	0	4			0	0	0	0	1	0	0				0		0	0	0		0		0		0		0		0		0
9030	1	50	1958-07-10	4	Cavite	2009-06-21	2009	NR	0				1	5	60	0		0	0	4			0	0	0	0	1	0	0
9033	1	66	1942-12-13	1	Pangasinan	2009-07-10	2009	NR					1			0		3	0	999													0		0	0	0		0		0		0		0		0		0
9034	1	48	1960-11-05	1	Pangasinan	2009-07-12	2009	NR	0				1	1	210	0		0	0	5			0	0	0	0	0	1	0				0		0	0	0		0		0		0		0		0		0
9035	0	14	1994-10-07	4	Batangas	2009-07-23	2009	NR	0				1	6	210	0		0	0	5			0	0	0	0	0	1	0	1			0		0	0	0		0		0		0		0		0		0
9036	1	49	1959-09-05	3	Tarlac	2009-07-30	2009	NR	0				1	6	30	0		0	0	3			0	0	0	1	0	0	0				0		0	0	0		0		0		0		0		0		0
9037	1	14	1995-03-18	4	Rizal	2009-08-03	2009	None	0				1	6	60	0		0	0	4			0	0	0	0	1	0	0	2			0		0	0	0		0		0		0		0		0		0
9038	1	8	2001-05-09	4	Quezon	2009-08-19	2009	NR					1	7	30	0	0	0	0	4			0	0	0	0	1	0	0				0		0	0	0		0		0		0		0		0		0
9039	0	26	1983-06-21	4	Rizal	2009-08-20	2009	NR	0				1	6	60	0		0	0	5			0	0	0	0	0	1	0				0		0	0	0		0		0		0		0		0		0
9040	0	52	1957-05-06	1	Pangasinan	2009-08-21	2009	NR	0				2					5	0	999													0		0	0	0		0		0		0		0		0		0
9041	1	66	1943-01-23	0	NCR	2009-08-22	2009	NR	0				1	7	60	0	1	0	0	0			1	0	0	0	0	0	0				0		0	0	0		0		0		0		0		0		0
9043	1	5	2004-02-04	0	NCR	2009-09-07	2009	NR	0				1		1095	0		0	0	5			0	0	0	0	0	1	0				0		0	0	0		0		0		0		0		0		0
9046	0	6	2002-11-03	4	Rizal	2009-09-15	2009	NR	0				1	8	30	0		0	0	6			0	0	0	0	0	0	1				0		0	0	0		0		0		0		0		0		0
9050	0	60	1949-08-12	4	Quezon	2009-10-08	2009	NR	0				1	5	150	0	1	0	0	5			0	0	0	0	0	1	0	2			0		0	0	0		0		0		0		0		0		0
9051	0	53	1956-01-19	0	NCR	2009-10-16	2009	NR	0				1		1800	0		0		99			0	0	0	0	0	0	0				0		0	0	0		0		0		0		0		0		0
9052	0	67	1942-01-23	0	NCR	2009-10-17	2009	NR	0				1	9	30	0	0	0	0	4			0	0	0	0	1	0	0				1	2009-10-16	1	1	1	2009-10-16	0		0		0		0		1		1
9053	1	49	1960-02-07	4	Laguna	2009-10-22	2009	NR	0				1	6	120	0		0	0	5			0	0	0	0	0	1	0
9054	1	38	1971-05-04	4	Laguna	2009-11-02	2009	NR					1	9	60	0		0		99			0	0	0	0	0	0	0				0		0	0	0		0		0		0		0		0		0
9055	1	40	1969-10-27	0	NCR	2009-11-05	2009	NR	0				1	4	210	0		0	0	4			0	0	0	0	1	0	0
9056	0	51	1958-11-12	4	Rizal	2009-11-12	2009	NR	0				1	7	120	0		0	0	5			0	0	0	0	0	1	0	1			0		0	0	0		0		0		0		0		0		0
9057	1	6	2003-02-07	1	Pangasinan	2009-11-13	2009	NR	0				1		365	0		0		99			0	0	0	0	0	0	0	2			0		0	0	0		0		0		0		0		0		0
9058	1	71	1938-10-13	4	Laguna	2009-11-13	2009	NR	0				1	9	30	0		0	0	4			0	0	0	0	1	0	0	1			0		0	0	0		0		0		0		0		0		0
8001	1	19	1988-12-05	3	Bulacan	2008-01-02	2008	NR	0				1	10	90	1	0	0	0	3			0	0	0	1	0	0	0			1
8002	1	30	1977-03-03	3	Nueva ecija	2008-01-03	2008	NR					1	12	30	0	0	0	0	5			0	0	0	0	0	1	0
8003	0	27	1980-02-02	4	Cavite	2008-01-13	2008	NR	0				2					5	0	999													0		0	0	0		0		0		0		0		0		0
8004	0	42	1965-10-02	3	Bulacan	2008-01-19	2008	NR	0				1	11	60	0		0	0	5			0	0	0	0	0	1	0				0		0	0	0		0		0		0		0		0		0
8005	0	14	1993-05-15	4	Cavite	2008-01-23	2008	NR	0				1	12	60	0		0	0	5			0	0	0	0	0	1	0				0		0	0	0		0		0		0		0		0		0
8006	1	62	1945-04-30	3	Tarlac	2008-01-23	2008	NR	1	Asthma, PTB			1	6	210	0	1	0	0	4			0	0	0	0	1	0	0	1			0		0	0	0		0		0		0		0		0		0
8007	1	83	1924-04-08	3	Nueva ecija	2008-01-25	2008	NR	0				1	12	30	0		0		99			0	0	0	0	0	0	0	2			0		0	0	0		0		0		0		0		0		0
8009	1	54	1953-02-10	4	Rizal	2008-01-30	2008	NR	0				1	10	90	0		0	0	5			0	0	0	0	0	1	0	2			0		0	0	0		0		0		0		0		0		0
8011	1	5	2002-08-12	3	Nueva ecija	2008-02-17	2008	NR	0				1	12	60	0		0	0	5			0	0	0	0	0	1	0				0		0	0	0		0		0		0		0		0		0
8012	0	5	2002-04-21	4	Quezon	2008-02-19	2008	NR	0				1	12	60	0		0	0	4			0	0	0	0	1	0	0				0		0	0	0		0		0		0		0		0		0
8013	1	50	1957-10-05	0	NCR	2008-02-20	2008	NR	0		1	1	1			0		0	0	4			0	0	0	0	1	0	0	1			0		0	0	0		0		0		0		0		0		0
8015	1	16	1991-04-03	1	Pangasinan	2008-03-09	2008	NR	0				1	2	14	0	0	0	0	5			0	0	0	0	0	1	0
8016	1	12	1996-01-13	0	NCR	2008-03-11	2008	NR	0				1			0		0	0	5			0	0	0	0	0	1	0	1			0		0	0	0		0		0		0		0		0		0
8017	0	2	2006-01-01	4	Quezon	2008-03-12	2008	NR	0				1	2	30	0	1	0	0	4			0	0	0	0	1	0	0	1			0		0	0	0		0		0		0		0		0		0
8018	1	24	1983-09-23	4	Rizal	2008-03-17	2008	NR	0				1	12	90	0		0	0	3			0	0	0	1	0	0	0	2			0		0	0	0		0		0		0		0		0		0
8019	1	42	1965-11-05	0	NCR	2008-03-19	2008	NR	0				1	6	300	0	1	0	0	4			0	0	0	0	1	0	0	2			0		0	0	0		0		0		0		0		0		0
8020	1	73	1934-05-29	0	NCR	2008-03-24	2008	Driver	1	Kidney stone, RA			1	12	90	0		0	0	5			0	0	0	0	0	1	0	1			0		0	1	1	2008-03-24	0		0		0		0		1		1
8021	1	60	1947-09-11	0	NCR	2008-03-28	2008	NR					1	9	210	0		0	0	4			0	0	0	0	1	0	0	1			1			1	1		0		0		0		0		1
8022	1	11	1996-10-10	3	Nueva ecija	2008-04-02	2008	NR	0				1	2	60	0	0	0	0	4			0	0	0	0	1	0	0	2			0		0	0	0		0		0		0		0		0		0
8023	1	42	1965-11-03	4	Rizal	2008-04-12	2008	NR	1	Asthma			1	9	210	0	0	0	0	5			0	0	0	0	0	1	0				1			1	1		0		0		0		0		1
8024	1	20	1987-08-21	2	Isabera	2008-04-15	2008	NR	1	Post-Herniorrhaphy			1	6	270	0		0		99			0	0	0	0	0	0	0	2			0		0	0	0		0		0		0		0		0		0
8025	0	5	2002-12-02	3	Bulacan	2008-04-20	2008	NR	0				1		1095	0	0	0	0	4			0	0	0	0	1	0	0				0		0	0	0		0		0		0		0		0		0
8026	0	49	1958-06-23	0	NCR	2008-04-24	2008	NR	1	Asthma			1	3	60	0	0	0	0	4			0	0	0	0	1	0	0				0		0	0	0		0		0		0		0		0		0
8028	1	35	1973-03-30	3	Pampanga	2008-05-03	2008	NR	0				1	4	30	0		0	0	4			0	0	0	0	1	0	0				0		0	0	0		0		0		0		0		0		0
8029	1	81	1926-06-04	1	Pangasinan	2008-05-03	2008	NR					1	3	30	0		0	0	4			0	0	0	0	1	0	0	1			0		0	0	0		0		0		0		0		0		0
8031	1	34	1974-03-05	3	Tarlac	2008-05-15	2008	NR	0				1	3	60	0	1	0	0	5			0	0	0	0	0	1	0	1			0		0	0	0		0		0		0		0		0		0
8032	1	30	1978-03-09	3	Nueva ecija	2008-05-26	2008	NR	0				1	4	30	0		0	0	5			0	0	0	0	0	1	0	0			0		0	0	0		0		0		0		0		0		0
8034	0	52	1956-03-06	0	NCR	2008-05-30	2008	NR	0				1	3	60	0		0	0	4			0	0	0	0	1	0	0	2			1			1	1		0		0		0		0		1
8036	1	59	1948-07-10	1	Pangasinan	2008-06-27	2008	NR	0				1	1	150	0		0	0	4			0	0	0	0	1	0	0	2			0		0	0	0		0		0		0		0		0		0
8038	1	43	1965-04-14	4	Cavite	2008-07-13	2008	NR					1	6	30	0	0	0	0	4			0	0	0	0	1	0	0	1			0		0	0	0		0		0		0		0		0		0
8039	1	39	1968-10-29	1	Pangasinan	2008-07-16	2008	NR	0				1	3	120	0		0	0	5			0	0	0	0	0	1	0				0		0	0	0		0		0		0		0		0		0
8041	1	42	1966-06-28	3	Nueva ecija	2008-07-26	2008	NR	0				1	2	150	0	0	0	0	5			0	0	0	0	0	1	0	1
8042	0	75	1933-01-03	4	Rizal	2008-07-27	2008	NR	0				1	6	30	0		0	0	5			0	0	0	0	0	1	0	2			0		0	0	0		0		0		0		0		0		0
8043	1	43	1965-03-22	0	NCR	2008-07-28	2008	NR	0				1	4	120	0		0	0	4			0	0	0	0	1	0	0	1			0		0	0	0		0		0		0		0		0		0
8044	1	26	1982-04-18	3	Pampanga	2008-07-30	2008	Farmer					1		1306	0	1	0	0	5			0	0	0	0	0	1	0				0		0	0	0		0		0		0		0		0		0
8045	1	22	1985-11-19	0	NCR	2008-08-07	2008	NR	0				1	6	60	0	0	0	0	4			0	0	0	0	1	0	0				0		0	0	0		0		0		0		0		0		0
8046	1	31	1976-12-24	4	Cavite	2008-08-27	2008	NR	1	Illicit drug use			1	5	90	0		0		99			0	0	0	0	0	0	0				0		0	0	0		0		0		0		0		0		0
8047	1	43	1965-01-26	1	Pangasinan	2008-09-04	2008	NR	0				1	8	30	0	0	0	0	5			0	0	0	0	0	1	0				0		1	1	1	2008-09-04	0		0		0		0		1		1
8048	1	70	1938-06-13	0	NCR	2008-09-27	2008	NR	0				1	7	365	0	1	0		99			0	0	0	0	0	0	0	1			0		0	0	0		0		0		0		0		0		0
8049	1	39	1969-01-14	3	Tarlac	2008-10-01	2008	NR	0				1			0		0		99			0	0	0	0	0	0	0				0		0	0	0		0		0		0		0		0		0
8050	1	30	1978-09-04	1	Pangasinan	2008-10-02	2008	NR	0				1	8	60	0	1	0	0	3			0	0	0	1	0	0	0	2			0		0	0	0		0		0		0		0		0		0
8051	1	44	1964-08-12	3	Bulacan	2008-10-02	2008	NR	0				1	8	60	0		0	0	4			0	0	0	0	1	0	0	2
8052	1	44	1964-09-24	3	Nueva ecija	2008-10-09	2008	NR	0				1	7	60	0		0	0	3			0	0	0	1	0	0	0	2			0		0	0	0		0		0		0		0		0		0
8054	1	40	1968-07-11	3	Bulacan	2008-11-08	2008	NR	0				1	8	90	0	1	0	0	3			0	0	0	1	0	0	0	2			0		0	0	0		0		0		0		0		0		0
8056	0	38	1970-09-19	5	Camarines Norte	2008-11-11	2008	NR	0				1	9	30	0		0		99			0	0	0	0	0	0	0	2			0		0	0	0		0		0		0		0		0		0
8057	1	54	1954-10-18	3	Nueva ecija	2008-11-15	2008	NR	0				1		365	0		0		99			0	0	0	0	0	0	0				0		0	0	0		0		0		0		0		0		0
8058	1	9	1999-07-24	4	Laguna	2008-11-19	2008	NR					1	9	60	0	0	0		99			0	0	0	0	0	0	0				0		0	0	0		0		0		0		0		0		0
8059	1	42	1966-03-30	4	Cavite	2008-11-20	2008	NR	0				1	11	8	0	0	0	0	5			0	0	0	0	0	1	0				0		0	0	0		0		0		0		0		0		0
8060	1	55	1952-12-13	3	Zambales	2008-11-22	2008	NR	0				1	9	30	0	0	0	0	5			0	0	0	0	0	1	0				0		0	0	0		0		0		0		0		0		0
8061	1	66	1942-07-03	4	Quezon	2008-11-24	2008	NR	1	HTN	0	0	1	9	60	0		0	0	3			0	0	0	1	0	0	0				0		0	0	0		0		0		0		0		0		0
8063	1	19	1989-12-04	3	Pampanga	2008-12-22	2008	NR	0				1	10	90	0		0	0	3			0	0	0	1	0	0	0	0			0		0	0	0		0		0		0		0		0		0
8064	1	5	2003-05-23	3	Pampanga	2008-12-23	2008	NR					1	10	90	0	1	0		99			0	0	0	0	0	0	0				0		0	0	0		0		0		0		0		0		0
7001	0	76	1930-04-20	0	NCR	2007-01-14	2007	NR	0				1	11	60	0		0	0	4			0	0	0	0	1	0	0	1			0		0	0	0		0		0		0		0		0		0
7002	1	46	1960-05-03	3	Nueva ecija	2007-01-18	2007	NR	0				1	10	120	0	0	0	0	5			0	0	0	0	0	1	0				0		0	0	0		0		0		0		0		0		0
7003	1	43	1963-10-27	4	Rizal	2007-01-22	2007	NR	0				1	9	120	0	0	0	0	5			0	0	0	0	0	1	0	2			0		0	0	0		0		0		0		0		0		0
7004	1	20	1986-12-09	3	Bulacan	2007-01-27	2007	NR	0				1		3650	0		0	0	4			0	0	0	0	1	0	0
7005	1	24	1983-01-08	4	Oriental Mindoro	2007-01-30	2007	NR			0	0	1			0		0	0	5			0	0	0	0	0	1	0	1			0		0	0	0		0		0		0		0		0		0
7006	1	24	1982-08-30	3	Nueva ecija	2007-02-03	2007	NR	0				2					5	0	999													0		0	0	0		0		0		0		0		0		0
7007	1	48	1958-08-10	5	Albay	2007-02-06	2007	NR	0				1	12	60	0		0	0	5			0	0	0	0	0	1	0				0		0	0	0		0		0		0		0		0		0
7008	1	36	1970-09-10	0	NCR	2007-02-27	2007	NR					1	12	60	0		0		99			0	0	0	0	0	0	0	1			1			1	1		1		1		1		0		4
7009	0	68	1938-03-30	3	Bulacan	2007-03-02	2007	NR	1	HTN			1	1	30	0		0	0	3			0	0	0	1	0	0	0	1			0		0	0	0		0		0		0		0		0		0
7010	1	39	1967-12-23	0	NCR	2007-03-13	2007	NR	0				1	1	60	0	1	1	0	999										1			0		0	0	0		0		0		0		0		0		0
7012	0	18	1988-10-06	3	Bulacan	2007-04-02	2007	NR	1	Chicken pox			1	2	30	0		0	0	3			0	0	0	1	0	0	0	1			0		0	0	0		0		0		0		0		0		0
7013	1	39	1968-01-22	3	Nueva ecija	2007-04-02	2007	NR					1	7	240	0	0	0	0	3			0	0	0	1	0	0	0	2			0		0	0	0		0		0		0		0		0		0
7014	1	54	1952-06-10	3	Bulacan	2007-04-06	2007	NR	0				1	12	120	0	0	0	0	4			0	0	0	0	1	0	0				0		0	0	0		0		0		0		0		0		0
7015	1	10	1996-11-02	0	NCR	2007-04-17	2007	NR	0				1		365	0		0	1	99			0	0	0	0	0	0	0	1
7016	1	53	1954-01-20	4	Rizal	2007-04-22	2007	NR	0				1	3	30	0	0	3	0	999								1		1			1			1	1		0		0		0		0		1		0
7017	1	17	1989-05-07	3	Bulacan	2007-04-23	2007	NR	0				1	2	60	0	1	0	0	5			0	0	0	0	0	1	0				0		0	0	0		0		0		0		0		0		0
7018	0	21	1985-07-29	0	NCR	2007-04-24	2007	NR					1	3	60	0		0	0	4			0	0	0	0	1	0	0				0		0	0	0		0		0		0		0		0		0
7019	1	36	1970-08-12	4	Rizal	2007-04-25	2007	NR	0				1	2	60	0		0	0	3			0	0	0	1	0	0	0	2			1	2007-04-03		1	1	2007-04-23	0		0		0		0		1		0
7020	1	33	1973-10-07	3	Nueva ecija	2007-04-26	2007	NR	0				1	12	120	0		0	0	5			0	0	0	0	0	1	0	2			0		0	0	0		0		0		0		0		0		0
7021	1	27	1979-06-04	3	Bulacan	2007-05-06	2007	NR					1	3	60	0	0	0	0	5			0	0	0	0	0	1	0				0		0	0	0		0		0		0		0		0		0
7022	1	24	1983-03-03	3	Nueva ecija	2007-05-08	2007	NR	1	Folliculitis			1	3	60	0		0	0	5			0	0	0	0	0	1	0				0		0	0	0		0		0		0		0		0		0
7024	1	67	1940-04-09	3	Bulacan	2007-05-09	2007	NR					1	3	60	0		0	0	4			0	0	0	0	1	0	0	2			0		0	0	0		0		0		0		0		0		0
7025	0	5	2001-12-15	4	Rizal	2007-05-10	2007	NR	0				1	3	60	0		0	0	5			0	0	0	0	0	1	0	2		1	0		0	0	0		0		0		0		0		0		0
7026	0	71	1936-03-21	1	Pangasinan	2007-05-10	2007	NR					1	2	90	0		0	0	4			0	0	0	0	1	0	0	2			0		0	0	0		0		0		0		0		0		0
7027	1	57	1949-08-22	1	Pangasinan	2007-05-21	2007	NR	0				1			0		0		99			0	0	0	0	0	0	0	2			0		0	0	0		0		0		0		0		0		0
7028	1	18	1989-03-24	4	Rizal	2007-05-25	2007	NR					1	11	210	0		0	0	99			0	0	0	0	0	0	0	1			0		0	0	0		0		0		0		0		0		0
7029	0	39	1967-08-14	1	Pangasinan	2007-05-28	2007	NR	0				1	4	60	0		0	0	4			0	0	0	0	1	0	0	2
7030	1	18	1988-10-16	4	Cavite	2007-06-05	2007	NR	0				1	4	60	0	1	0	0	4			0	0	0	0	1	0	0				0		0	0	0		0		0		0		0		0		0
7032	1	54	1953-05-25	0	NCR	2007-06-14	2007	NR	0				1	11	225	0	0	0		99			0	0	0	0	0	0	0	1			0		0	0	0		0		0		0		0		0		0
7034	0	5	2002-01-09	3	Nueva ecija	2007-06-20	2007	NR	0				1	3	90	0	0	0	0	5			0	0	0	0	0	1	0				0		0	0	0		0		0		0		0		0		0
7035	0	5	2002-04-18	0	NCR	2007-06-20	2007	NR	0				1	5	30	0		0	1	0	6		1	0	0	0	0	0	1	0			1		1	1	1	2007-06-20	0		0		0		0		1		1
7036	1	17	1990-01-25	6	Misamis Occidental	2007-06-25	2007	NR	0				1	4	60	0		0	0	5			0	0	0	0	0	1	0				0		0	0	0		0		0		0		0		0		0
7037	1	48	1959-04-23	4	Quezon	2007-06-25	2007	NR	1	Asthma			1	4	90	0	0	0	0	5			0	0	0	0	0	1	0	1			0		0	0	0		0		0		0		0		0		0
7038	0	57	1949-10-04	0	NCR	2007-06-28	2007	NR	0				1	5	30	0		0	0	3			0	0	0	1	0	0	0	1			0		0	0	0		0		0		0		0		0		0
7039	1	4	2002-08-29	0	NCR	2007-06-28	2007	NR	0				1	5	60	0		0	0	0			1	0	0	0	0	0	0	1			1	2007-06-28	1	1	1	2007-06-28	0		0		0		0		1
7040	1	38	1968-12-26	4	Rizal	2007-07-10	2007	NR					1	5	60	0	0	0	1	4	5		0	0	0	0	1	1	0	0			0		0	0	0		0		0		0		0		0		0
7041	1	51	1956-05-11	4	Rizal	2007-07-18	2007	NR	0				1	3	150	0		0	0	5			0	0	0	0	0	1	0	2
7042	0	9	1998-05-24	4	Rizal	2007-07-18	2007	NR					1	6	30	0	0	0	0	5			0	0	0	0	0	1	0				1		1	1	1	2007-07-14	1		0		0		0		2		1
7043	1	51	1956-04-26	4	Rizal	2007-07-29	2007	NR	0				1	4	90	0		0	0	4			0	0	0	0	1	0	0	1			0		0	0	0		0		0		0		0		0		0
7044	1	26	1981-07-26	3	Bulacan	2007-08-10	2007	NR					1	1	210	0		0	0	5			0	0	0	0	0	1	0	2			0		0	0	0		0		0		0		0		0		0
7045	1	52	1955-04-18	3	Bulacan	2007-08-11	2007	NR	0				1	6	60	0		0	0	5			0	0	0	0	0	1	0	1			0		0	0	0		0		0		0		0		0		0
7046	1	58	1949-04-16	2	Nueva Vizcaya	2007-08-16	2007	NR	0				1	6	60	0		0	0	5			0	0	0	0	0	1	0	2			0		0	0	0		0		0		0		0		0		0
7047	1	65	1941-11-07	3	Bulacan	2007-08-16	2007	NR	0				1	1	210	0		0	0	3			0	0	0	1	0	0	0	1			0		0	0	0		0		0		0		0		0		0
7048	1	48	1959-01-29	0	NCR	2007-08-22	2007	NR	0				1	6	60	0		0	0	3			0	0	0	1	0	0	0
7049	0	73	1934-06-16	1	Pangasinan	2007-08-24	2007	NR	0				1	7	30	0		0	0	4			0	0	0	0	1	0	0				0		0	0	0		0		0		0		0		0		0
7050	1	33	1974-06-29	4	Laguna	2007-08-27	2007	NR					1	6	90	0	0	0	0	5			0	0	0	0	0	1	0	2			1	2007-08-25	2	1	1	2007-08-25	0		0		0		0		1	0
7051	1	31	1975-11-15	3	Nueva ecija	2007-08-29	2007	NR	0				1	7	30	0		0		99			0	0	0	0	0	0	0	2			0		0	0	0		0		0		0		0		0		0
7052	0	56	1951-02-24	3	Bulacan	2007-08-31	2007	NR	0				1	6	60	0	1	0	1	4	5		0	0	0	0	1	1	0	2			0		0	0	0		0		0		0		0		0		0
7053	1	30	1977-03-10	3	Bulacan	2007-09-03	2007	NR					1	12	240	0		0		99			0	0	0	0	0	0	0	2			0		0	0	0		0		0		0		0		0		0
7056	1	9	1998-02-12	1	Pangasinan	2007-09-17	2007	NR	0				1	8	30	0	0	0	0	5			0	0	0	0	0	1	0				0		0	0	0		0		0		0		0		0		0
7057	1	17	1990-07-09	3	Bataan	2007-09-19	2007	NR	0				1		365	0		0	1	4	5		0	0	0	0	1	1	0				0		0	0	0		0		0		0		0		0		0
7058	1	4	2003-02-16	0	NCR	2007-09-29	2007	NR	0				1	9	30	0	1	0	0	4			0	0	0	0	1	0	0	2
7059	1	59	1948-04-28	3	Bulacan	2007-10-08	2007	NR	0				1	8	60	0	0	0	0	5			0	0	0	0	0	1	0				0		0	0	0		0		0		0		0		0		0
7060	1	24	1983-08-14	3	Bulacan	2007-10-09	2007	NR	0				1	8	60	0	0	0	0	5			0	0	0	0	0	1	0				0		0	0	0		0		0		0		0		0		0
7061	0	11	1995-10-14	3	Nueva ecija	2007-10-12	2007	NR					1	8	60	0	1	0	0	5			0	0	0	0	0	1	0	2			0		0	0	0		0		0		0		0		0		0
7062	0	58	1949-03-06	3	Pampanga	2007-10-12	2007	NR	0				1	9	40	0		0	1	3	5		0	0	0	1		1	0	1
7063	1	26	1980-12-03	2	Cagayan	2007-10-14	2007	NR	0				1	9	30	0		0	0	4			0	0	0	0	1	0	0	1			0		0	0	0		0		0		0		0		0		0
7064	1	34	1972-11-17	4	Rizal	2007-10-25	2007	NR					1	9	30	0		0		99			0	0	0	0	0	0	0	1			0		0	0	0		0		0		0		0		0		0
7066	0	25	1982-04-20	4	Rizal	2007-11-14	2007	NR	1	Schistosomiasis			1		1460	0		0		99			0	0	0	0	0	0	0	0
7071	1	40	1967-08-02	3	Tarlac	2007-12-07	2007	NR	0				1	11	30	0		0	0	5			0	0	0	0	0	1	0	2			0		0	0	0		0		0		0		0		0		0
6001	1	39	1966-12-23	4	Rizal	2006-07-01	2006	NR	0				1	5	60	0		0	0	4			0	0	0	0	1	0	0	1			0		0	0	0		0		0		0		0		0		0
6002	1	11	1994-07-24	4	Rizal	2006-07-08	2006	NR	0				1	5	60	0		0	0	4			0	0	0	0	1	0	0	2			0		0	0	0		0		0		0		0		0		0
6003	1	51	1954-08-18	3	Nueva ecija	2006-07-08	2006	NR	0				1	5	60	0	0	0	0	3			0	0	0	1	0	0	0				0		0	0	0		0		0		0		0		0		0
6004	0	47	1959-02-28	3	Pampanga	2006-08-04	2006	NR	0				1	3	150	0		0	0	5			0	0	0	0	0	1	0	1			0		0	0	0		0		0		0		0		0		0
6005	0	49	1957-03-13	3	Bulacan	2006-08-05	2006	NR	0				1	7	13	0		0	0	5			0	0	0	0	0	1	0				0		0	0	0		0		0		0		0		0		0
6006	1	28	1977-09-27	3	Nueva ecija	2006-08-09	2006	NR	0				1		1825	0		0	0	4			0	0	0	0	1	0	0	1
6007	0	39	1966-09-15	3	Nueva ecija	2006-08-14	2006	Farmer	0				1	6	60	0		0	0	5			0	0	0	0	0	1	0				0		0	0	0		0		0		0		0		0		0
6008	0	36	1970-04-12	4	Cavite	2006-08-17	2006	None					1	12	240	0		0	0	3			0	0	0	1	0	0	0				0		0	0	0		0		0		0		0		0		0
6009	0	29	1977-06-18	0	NCR	2006-08-24	2006	NR					1	6	90	0		0	0	4			0	0	0	0	1	0	0
6010	1	44	1962-01-06	0	NCR	2006-08-28	2006	NR	1	PTB			1	5	90	0		0	0	5			0	0	0	0	0	1	0	2
6011	1	71	1935-06-05	3	Bulacan	2006-09-15	2006	NR	0				1	7	60	0		0	0	4			0	0	0	0	1	0	0				0		0	0	0		0		0		0		0		0		0
6012	0	53	1953-04-18	4	Cavite	2006-09-20	2006	NR	0				1	8	30	0	0	0	0	5			0	0	0	0	0	1	0				1			1	1		1		1		0		0		3	0	0
6013	0	72	1933-11-04	4	Batangas	2006-09-24	2006	NR	0				1	8	30	0		0	0	3			0	0	0	1	0	0	0				0		0	0	0		0		0		0		0		0		0
6014	1	18	1988-05-05	6	South Cotabato	2006-09-26	2006	NR	0				1	8	60	0		0	0	3			0	0	0	1	0	0	0	3			1			1	1		0		0		0		0		1
6015	0	68	1937-11-19	2	Cagayan	2006-09-29	2006	NR	0				1	5	120	0	1	0	0	4			0	0	0	0	1	0	0				0		0	0	0		0		0		0		0		0		0
6017	1	22		0	NCR	2006-10-11	2006	NR	0				1	5	120	0		0		99			0	0	0	0	0	0	0				0		0	0	0		0		0		0		0		0		0
6018	1	20	1986-08-03	0	NCR	2006-10-17	2006	NR	0				1	8	90	0		0	0	4			0	0	0	0	1	0	0
6019	0	85	1921-02-16	0	NCR	2006-10-22	2006	NR	0				1	7	90	1		0	0	4			0	0	0	0	1	0	0	1			0		0	0	0		0		0		0		0		0		0
6020	1	23	1983-08-04	4	Laguna	2006-11-13	2006	NR	1	Illicit drug use			1	9	90	0	0	0		99			0	0	0	0	0	0	0	2			0		0	0	0		0		0		0		0		0		0
6021	0	7	1999-11-15	0	NCR	2006-11-23	2006	NR	0				1	10	30	0	1	0		99			0	0	0	0	0	0	0				0		0	0	0		0		0		0		0		0		0
6022	1	36	1969-12-12	3	Pampanga	2006-11-24	2006	Farmer	0				1	5	210	0		0		99			0	0	0	0	0	0	0	2			0		0	0	0		0		0		0		0		0		0
6023	1	35	1971-03-30	3	Nueva ecija	2006-11-27	2006	NR	0				1	11	4	0		3	0	999													0		0	0	0		0		0		0		0		0		0
6024	1	7	1999-08-19	3	Nueva ecija	2006-11-27	2006	NR	0				1	11	14	0		0	1	3	4		0	0	0	1	1	0	0	0			0		0	0	0		0		0		0		0		0		0
6025	1	26	1980-01-27	3	Nueva ecija	2006-12-25	2006	NR	0				1	7	120	0	0	0	0	3			0	0	0	1	0	0	0				0		0	0	0		0		0		0		0		0		0
6026	1	45	1961-05-21	4	Rizal	2006-12-29	2006	NR					1	11	30	0		0		99			0	0	0	0	0	0	0	2			0		0	0	0		0		0		0		0		0		0
[truncated: 65 more columns]

## Sheet: dic
variable name	explanation		detail
sid	study id 1
ssid	study id 2
hid	hosital id
sex	sex		0: female , 1: male
age	age at admission
dob	date of birth
region	region		0: NCR, 1: region1, 2: region2, 3: region3, 4: region4, 5: region5, 10: region10, 99: NR
province	province name
doa	date of admission
year	year of admission
ocu	occupation
med_history	Chronic medical history		0: No, 1: Yes
medcon	content of medical history
alco	alchohol_intake		0: No, 1: Yes,
smoker	smoking		0: No, 1: Yes,
aniexp	past any animal exposure (if written in medical chart, any)		0: No, 1: Yes, 2: Unknown,
aniexpmonth	month of the animal exposure
aniexpday	duration between animal exposure and admissino (days)
typeanimal	type of animal bite		0: Dog, 1: Cat, 2: Others
pet	stray dog or not		0: Stray, 1: Domestic pets
nonbite	bite type and non-bite exposure		0: BITE EXPOSURE, 1: Scratch, 2: Licked, 3: Eating dog meat, 4: Others, 5:NR
multibite	multiple bite or single bite?		0: Single or non-bite, 1: Multiple,
bitesite1	bite site 1		0: Face 1: Head 2: Neck 3: Fingers 4: Upper extremities 5: Lower extremities 6: Others 99: NR
bitesite2	bite site 2		0: Face 1: Head 2: Neck 3: Fingers 4: Upper extremities 5: Lower extremities 6: Others 99: NR
bitesite3	bite site 3		0: Face 1: Head 2: Neck 3: Fingers 4: Upper extremities 5: Lower extremities 6: Others 99: NR
face	Face bite or not		0;no, 1:yes
head	Head bite or not		0;no, 1:yes
neck	Neck bite or not		0;no, 1:yes
finger	Fingers bite or not		0;no, 1:yes
uext	Upper extremities bite or not		0;no, 1:yes
lext	Lower extremities bite or not		0;no, 1:yes
otherbite	Other bite place		0;no, 1:yes
anista	animal status pt knows		0: Alive 1: Died 2: Killed 3: Sick " ": Unknown or NR
prevac	Previous rabies vaccination		0:no, 1 yes/immunized, " ": NR
woundtre	self initial would treatment		0:no, 1 yes, " ": NR
medicon	initial medical consult or not		0:no, 1 yes, " ": NR
domedicon	date of the initial medical consult
slhritmcon	SLH or RITM or other hospital consultation		0:no consultaion, 1:SLH, 2: RITM, 3: Others, " ": NR
pep	Post-Exposure Vaccination took or not		0:no,1:yes, " ":NR
vac1	1st vaccination (PEP) took or not		0:no,1:yes, " ":NR
dovac1	date of 1st vaccination (PEP) tool or not
vac2	2nd vaccination (PEP) took or not
dovac2	date of 2nd vaccination (PEP) tool or not
vac3	3rd vaccination (PEP) took or not
dovac3	date of 3rd vaccination (PEP) tool or not
vac4	4th vaccination (PEP) took or not
dovac4	date of 4th vaccination (PEP) tool or not
vac5	5th vaccination (PEP) took or not
dovac5	date of 5th vaccination (PEP) tool or not
freqpep	Frequency of PEP vac of 1course PEP	何回うったか、delayed PEP 1	0:no PEP, 1:once PEP, 2:twice, 3 three times, 4 four times, 5:five times, " ":PEP unknown or frequency unknown
vactype	vacination method ID or IM		0: ID, 1: IM, " ": NR
rig	Rabies Immunoglobulin (RIG) given or not		0:no,1:yes, " ": NR
dorig	Date of RIG
rigtype	Type of RIG
whocat	animal bite categories	１が０の事	1:category I, 2category II, 3 category III, 99:NR
cc1	Chief Complaint1
cc2	Chief Complaint2
cc3	Chief Complaint3
cc4	Chief Complaint4
cchp	hydrophobia as chief complaiant		0:no,1:yes,
ccap	Aerophobia as chief complaiant		0:no,1:yes,
ccfev	fever as chief complaiant		0:no,1:yes,
ccdob	difficulty of breathing as chief complaiant		0:no,1:yes,
fever	Fever during the admission	入院時の症状としてあったかどうか	0: No, 1: Yes yes, if seen within 24hrs from admission,
headache	Headache		0: No, 1: Yes yes, if seen within 24hrs from admission
hypersal	Hypersalivation		0: No, 1: Yes yes, if seen within 24hrs from admission
nau	Nausea / Vomitting		0: No, 1: Yes yes, if seen within 24hrs from admission
diffbre	Difficulty of Breathing		0: No, 1: Yes yes, if seen within 24hrs from admission
confu	Confusion / Agitation		0: No, 1: Yes yes, if seen within 24hrs from admission
coma	Coma		0: No, 1: Yes yes, if seen within 24hrs from admission
restless	Restlessness		0: No, 1: Yes yes, if seen within 24hrs from admission
behavior	Behavioral Change		0: No, 1: Yes yes, if seen within 24hrs from admission
seizure	Seizure		0: No, 1: Yes yes, if seen within 24hrs from admission
paralysis	Paralysis		0: No, 1: Yes yes, if seen within 24hrs from admission
muscleweak	Muscle Weakness		0: No, 1: Yes yes, if seen within 24hrs from admission
dyphagia	Dysphagia		0: No, 1: Yes yes, if seen within 24hrs from admission
trismus	Trismus		0: No, 1: Yes yes, if seen within 24hrs from admission
hp	Hydrophobia		0: No, 1: Yes yes, if seen within 24hrs from admission
ap	Aerophobia		0: No, 1: Yes yes, if seen within 24hrs from admission
pp	Photophobia		0: No, 1: Yes yes, if seen within 24hrs from admission
bitesitepain	Bite Site Pain		0: No, 1: Yes yes, if seen within 24hrs from admission
numbness	Numbness of Bite Site		0: No, 1: Yes yes, if seen within 24hrs from admission
itch	Itchiness of Bite Site		0: No, 1: Yes yes, if seen within 24hrs from admission
others1	Others1
others2	Others2
others3	Others3
others4	Others4
others5	Others5
others6	Others6
abdpain	Abd.pain		0: No, 1: Yes yes, if seen within 24hrs from admission
lossappe	Loss of appetite		0: No, 1: Yes yes, if seen within 24hrs from admission
chestpain	Chest pain		0: No, 1: Yes yes, if seen within 24hrs from admission
chills	Chills		0: No, 1: Yes yes, if seen within 24hrs from admission
spasm	Spasm		0: No, 1: Yes yes, if seen within 24hrs from admission
parasthesia	Paresthesia / Stiffness of body part		0: No, 1: Yes yes, if seen within 24hrs from admission
ht	Height
wt	Weight
bt2	body tempresure
sbp	systolic Blood pressure (mmHg)
dbp	diastolic blood pressure (mmHg)
hr	heart rate /hour
rr	respiratory rate / min
spo2	SpO2
diazepam	Diazepam given or not in SLH		0:no,1:yes, " ":: NR
haroperidol	Haroperidol iven or not in SLH		0:no,1:yes, " ":: NR
diphen	Diphendrahydramine iven or not in SLH		0:no,1:yes, " ":: NR
otherdrug	Other drug iven or not in SLH		0:no,1:yes, " ":: NR
ivfluid	IV Fluids iven or not in SLH		0:no,1:yes, " ":: NR
venti	Ventilation iven or not in SLH		0:no,1:yes, " ":: NR
notre	Just Observing / no treatment iven or not in SLH		0:no,1:yes, " ":: NR
finaldiag	SLH final diagnosis (discharge diagnosis)		0:rabies, 1 rabies encephlitis,
otherdiag	Other Diagnosis(If any)
outcome	Outcome		0:died, 1 survived
dod	date of discharge
duhosp	The Duration of Clinical Course (hours)
delayedpep	Delayed PEP, PEP was administrated after admission
hpapnegative	no hydrophobia or earophobia		0: have hp or ep, 0: no hp or ep
